# Supplementary material for: Machine Learning Methods for Gene Selection in Uveal Melanoma
Source: Int J Mol Sci. 2024 Feb 1;25(3):1796. doi: 10.3390/ijms25031796 (PMC10855534; doi:10.3390/ijms25031796)
Supplement: Supplementary file 1 [file ijms-25-01796-s001.zip › ijms-2820766-supplementary S2.xlsx]

## Sheet: S2
Enrichment FDR	nGenes	Pathway Genes	Fold Enrichment	Pathway	URL	Genes
0.0243657	2	36	74.7745	GO:0032743 positive reg. of interleukin-2 production	http://amigo.geneontology.org/amigo/term/GO:0032743	CARD11 PDE4B
0.0306971	3	207	19.5064	GO:0043123 positive reg. of I-kappaB kinase/NF-kappaB signaling	http://amigo.geneontology.org/amigo/term/GO:0043123	TNFRSF19 CARD11 HTR2B
0.0173865	4	376	14.3185	GO:0032496 response to lipopolysaccharide	http://amigo.geneontology.org/amigo/term/GO:0032496	CPS1 IL12RB2 PTGER4 PDE4B
0.0173865	4	400	13.4594	GO:0002237 response to molecule of bacterial origin	http://amigo.geneontology.org/amigo/term/GO:0002237	CPS1 IL12RB2 PTGER4 PDE4B
0.00352429	6	620	13.0252	GO:0001819 positive reg. of cytokine production	http://amigo.geneontology.org/amigo/term/GO:0001819	IL12RB2 HTR2B CADM1 PTGER4 CARD11 PDE4B
0.0217823	4	435	12.3765	GO:0009410 response to xenobiotic stimulus	http://amigo.geneontology.org/amigo/term/GO:0009410	HTR2B CPS1 BCHE PDE4B
0.00887773	6	930	8.68349	GO:0001816 cytokine production	http://amigo.geneontology.org/amigo/term/GO:0001816	IL12RB2 HTR2B CADM1 PTGER4 CARD11 PDE4B
0.0392909	4	672	8.01155	GO:0006935 chemotaxis	http://amigo.geneontology.org/amigo/term/GO:0006935	MTUS1 ROBO1 CHL1 PDE4B
0.00887773	7	1312	7.18109	GO:0010628 positive reg. of gene expression	http://amigo.geneontology.org/amigo/term/GO:0010628	IL12RB2 HTR2B CADM1 PTGER4 CARD11 PDE4B ROBO1
0.032783	5	958	7.02475	GO:0014070 response to organic cyclic compound	http://amigo.geneontology.org/amigo/term/GO:0014070	HTR2B CPS1 BCHE ITPR2 PDE4B
0.0340996	5	980	6.86705	GO:0033993 response to lipid	http://amigo.geneontology.org/amigo/term/GO:0033993	CPS1 IL12RB2 BCHE PTGER4 PDE4B
0.0392909	5	1061	6.3428	GO:0010243 response to organonitrogen compound	http://amigo.geneontology.org/amigo/term/GO:0010243	HTR2B CPS1 BCHE ITPR2 PDE4B
0.0173865	7	1687	5.58482	GO:0051240 positive reg. of multicellular organismal proc.	http://amigo.geneontology.org/amigo/term/GO:0051240	IL12RB2 HTR2B ROBO1 CADM1 PTGER4 CARD11 PDE4B
0.0173865	7	1752	5.37762	GO:1901700 response to oxygen-containing compound	http://amigo.geneontology.org/amigo/term/GO:1901700	PTGER4 CPS1 HTR2B IL12RB2 BCHE ITPR2 PDE4B
0.0173865	7	1806	5.21683	GO:0048870 cell motility	http://amigo.geneontology.org/amigo/term/GO:0048870	MTUS1 ROBO1 PTGER4 CHL1 HTR2B PDE4B ROPN1
0.0173865	7	1806	5.21683	GO:0051674 localization of cell	http://amigo.geneontology.org/amigo/term/GO:0051674	MTUS1 ROBO1 PTGER4 CHL1 HTR2B PDE4B ROPN1
0.0392909	6	1602	5.04098	GO:0016477 cell migration	http://amigo.geneontology.org/amigo/term/GO:0016477	MTUS1 ROBO1 PTGER4 CHL1 HTR2B PDE4B
0.0392909	6	1660	4.86485	GO:0009719 response to endogenous stimulus	http://amigo.geneontology.org/amigo/term/GO:0009719	PTGER4 HTR2B CPS1 BCHE ITPR2 PDE4B
0.0243657	7	1992	4.72971	GO:0040011 locomotion	http://amigo.geneontology.org/amigo/term/GO:0040011	MTUS1 ROBO1 PTGER4 CHL1 HTR2B PDE4B ROPN1
