# Supplementary material for: Machine Learning Methods for Gene Selection in Uveal Melanoma
Source: Int J Mol Sci. 2024 Feb 1;25(3):1796. doi: 10.3390/ijms25031796 (PMC10855534; doi:10.3390/ijms25031796)
Supplement: Supplementary file 1 [file ijms-25-01796-s001.zip › Table_S1.xlsx]

## Sheet: Sheet1
GENE	CNAPE	IGC gain	IGC loss	Data Fusion	MethylMix	n overlap	position
SLC25A38	1	0	1	1	1	4	3p22.1
ROBO1	1	0	1	1	0	3	3p12.3
SATB1	1	0	1	1	0	3	3p24.3
MANEAL	1	0	1	1	0	3	1p34.3
PLXNB1	1	0	1	0	1	3	3p21.31
BAP1	1	0	1	1	0	3	3p21.1
ROPN1	1	0	1	1	0	3	3q21.1
LNP1	1	0	1	1	0	3	3q12.2
ROPN1B	1	0	1	1	0	3	3q21.2
PLN	0	0	1	1	1	3	6q22.31
SQLE	1	1	0	0	0	2	8q24.13
PTP4A3	1	1	0	0	0	2	8q24.3
KHDRBS3	1	1	0	0	0	2	8q24.23
SLCO5A1	1	1	0	0	0	2	8q13.3
AHNAK2	1	0	0	1	0	2	14q32.33
JPH1	1	1	0	0	0	2	8q21.11
MAFA	1	1	0	0	0	2	8q24.3
SEL1L3	1	0	0	1	0	2	4p15.2
FABP5	1	1	0	0	0	2	8q21.13
CADM1	1	0	0	1	0	2	11q23.3
ISM1	1	0	0	1	0	2	20p12.1
ITPR2	1	0	0	1	0	2	12p12.1
EXOSC7	1	0	1	0	0	2	3p21.31
AP2M1	1	0	1	0	0	2	3q27.1
MED20	1	1	0	0	0	2	6p21.1
LARS2	1	0	1	0	0	2	3p21.31
MSC	1	0	0	1	0	2	8q13.3
ZXDC	1	0	1	0	0	2	3q21.3
LSG1	1	0	1	0	0	2	3q29
CTH	1	0	1	0	0	2	1p31.1
MMACHC	1	0	1	0	0	2	1p34.1
SENP2	1	0	1	0	0	2	3q27.2
NICN1	1	0	1	0	0	2	3p21.31
KLHL24	1	0	1	0	0	2	3q27.1
VPS8	1	0	1	0	0	2	3q27.2
FAM131A	1	0	1	0	0	2	3q27.1
SNRK	1	0	1	0	0	2	3p22.1
DUSP7	1	0	1	0	0	2	3p21.2
XYLB	1	0	1	0	0	2	3p22.2
CCDC58	1	0	1	0	0	2	3q21.1
ARMC8	1	0	1	0	0	2	3q22.3
EIF1B	1	0	1	0	0	2	3p22.1
H1FX	1	0	1	0	0	2	3q21.3
GCNT2	1	1	0	0	0	2	6p24.3
NYNRIN	1	0	0	0	1	2	14q12
NCKIPSD	1	0	1	0	0	2	3p21.31
HNMT	1	0	0	0	1	2	2q22.1
ATP2C1	1	0	1	0	0	2	3q22.1
RBM15B	1	0	1	0	0	2	3p21.2
HPS3	1	0	1	0	0	2	3q24
QRICH1	1	0	1	0	0	2	3p21.31
HFE	1	1	0	0	0	2	6p22.2
ZNF860	1	0	1	0	0	2	3p23
MYO7B	1	0	0	1	0	2	2q14.3
EGFL8	1	1	0	0	0	2	6p21.32
NBEAL2	1	0	1	0	0	2	3p21.31
SLC41A3	1	0	1	0	0	2	3q21.2
LIMS2	1	0	0	1	0	2	2q14.3
LAMB2	1	0	1	0	0	2	3p21.31
PLCD1	1	0	1	0	0	2	3p22.2
BRPF1	1	0	1	0	0	2	3p25.3
CCDC50	1	0	1	0	0	2	3q28
LEKR1	1	0	1	0	0	2	3q25.31
ENPP2	1	0	0	1	0	2	8q24.12
TATDN2	1	0	1	0	0	2	3p25.3
SMARCC1	1	0	1	0	0	2	3p21.31
ATP13A3	1	0	1	0	0	2	3q29
CMTM6	1	0	1	0	0	2	3p22.3
CIDECP	1	0	1	0	0	2	3p25.3
SCN11A	1	0	1	0	0	2	3p22.2
C3orf17	1	0	1	0	0	2	3q13.2
PPM1M	1	0	1	0	0	2	3p21.2
HEMK1	1	0	1	0	0	2	3p21.2
MTMR14	1	0	1	0	0	2	3p25.3
SEC13	1	0	1	0	0	2	3p25.3
PDE4B	1	0	0	1	0	2	1p31.3
HYAL2	1	0	1	0	0	2	3p21.31
WDR6	1	0	1	0	0	2	3p21.31
EFS	1	0	0	1	0	2	14q11.2
CLCN2	1	0	1	0	0	2	3q27.1
WDR53	1	0	1	0	0	2	3q29
LRRFIP2	1	0	1	0	0	2	3p22.2
SERPINB9	1	1	0	0	0	2	6p25.2
ARF4	1	0	1	0	0	2	3p14.3
CDV3	1	0	1	0	0	2	3q22.1
PIK3R4	1	0	1	0	0	2	3q22.1
UBP1	1	0	1	0	0	2	3p22.3
WDR48	1	0	1	0	0	2	3p22.2
CNOT10	1	0	1	0	0	2	3p22.3
NPRL2	1	0	1	0	0	2	3p21.31
METTL6	1	0	1	0	0	2	3p25.1
RAB43	1	0	1	0	0	2	3q21.3
EHHADH	1	0	1	0	0	2	3q27.2
LYRM4	1	1	0	0	0	2	6p25.1
RNF123	1	0	1	0	0	2	3p21.31
COX17	1	0	1	0	0	2	3q13.33
DVL3	1	0	1	0	0	2	3q27.1
AHCYL2	1	0	0	1	0	2	7q32.1
SLC6A6	1	0	1	0	0	2	3p25.1
GORASP1	1	0	1	0	0	2	3p22.2
SETMAR	1	0	1	0	0	2	3p26.1
EIF4A2	1	0	1	0	0	2	3q27.3
RNF7	1	0	1	0	0	2	3q23
ACVR2B-AS1	1	0	1	0	0	2	3p22.2
KIAA2018	1	0	1	0	0	2	3q13.2
CCDC12	1	0	1	0	0	2	3p21.31
TUSC2	1	0	1	0	0	2	3p21.31
FAM86JP	1	0	1	0	0	2	3q21.2
ENPP1	1	0	1	0	0	2	6q23.2
NEDD9	1	1	0	0	0	2	6p24.2
ANAPC13	1	0	1	0	0	2	3q22.2
TMPPE	1	0	1	0	0	2	3p22.3
TMEM41A	1	0	1	0	0	2	3q27.2
TBC1D5	1	0	1	0	0	2	3p24.3
CCDC71	1	0	1	0	0	2	3p21.31
ACTL6A	1	0	1	0	0	2	3q26.33
ACTR8	1	0	1	0	0	2	3p21.1
NISCH	1	0	1	0	0	2	3p21.1
USP19	1	0	1	0	0	2	3p21.31
RUVBL1	1	0	1	0	0	2	3q21.3
ABT1	1	1	0	0	0	2	6p22.2
LSM3	1	0	1	0	0	2	3p25.1
TSEN2	1	0	1	0	0	2	3p25.2
SLC25A26	1	0	1	0	0	2	3p14.1
GPR153	1	0	1	0	0	2	1p36.31
ISY1	1	0	1	0	0	2	3q21.3
MST1	1	0	1	0	0	2	3p21.31
TMEM43	1	0	1	0	0	2	3p25.1
TFG	1	0	1	0	0	2	3q12.2
SHQ1	1	0	1	0	0	2	3p13
USP4	1	0	1	0	0	2	3p21.31
TFAP2A	1	1	0	0	0	2	6p24.3
EIF2B5	1	0	1	0	0	2	3q27.1
ACAD9	1	0	1	0	0	2	3q21.3
ANO10	1	0	1	0	0	2	3p22.1
KLF15	1	0	1	0	0	2	3q21.3
ACAA1	1	0	1	0	0	2	3p22.2
UMPS	1	0	1	0	0	2	3q21.2
OGG1	1	0	1	0	0	2	3p25.3
C3orf14	1	0	1	0	0	2	3p14.2
SS18L2	1	0	1	0	0	2	3p22.1
PARL	1	0	1	0	0	2	3q27.1
TIPARP	1	0	1	0	0	2	3q25.31
YEATS2	1	0	1	0	0	2	3q27.1
RAP2B	1	0	1	0	0	2	3q25.2
ZBTB11-AS1	1	0	1	0	0	2	3q12.3
MKRN2	1	0	1	0	0	2	3p25.2
PRKCD	1	0	1	0	0	2	3p21.1
SIAH2	1	0	1	0	0	2	3q25.1
IP6K2	1	0	1	0	0	2	3p21.31
SSR3	1	0	1	0	0	2	3q25.31
WDR82	1	0	1	0	0	2	3p21.2
FAM86HP	1	0	1	0	0	2	3q22.1
RAF1	1	0	1	0	0	2	3p25.2
ZDHHC3	1	0	1	0	0	2	3p21.31
ASTE1	1	0	1	0	0	2	3q22.1
ACSF2	1	0	0	1	0	2	17q21.33
MAGEF1	1	0	1	0	0	2	3q27.1
RAB7A	1	0	1	0	0	2	3q21.3
LMCD1	0	0	1	1	0	2	3p26.1
ALDH1L1	0	0	1	1	0	2	3q21.3
BCHE	0	0	1	1	0	2	3q26.1
SYNPR	0	0	1	1	0	2	3p14.2
CHL1	0	0	1	1	0	2	3p26.3
CD101	0	0	1	0	1	2	1p13.1
TMEM40	0	0	1	0	1	2	3p25.2
GBP2	0	0	1	0	1	2	1p22.2
PPP1R16A	0	1	0	0	1	2	8q24.3
SDC2	0	1	0	1	0	2	8q22.1
LY96	0	1	0	0	1	2	8q21.11
HLA-B	0	1	0	0	1	2	6p21.33
HLA-A	0	1	0	0	1	2	6p22.1
HCP5	0	1	0	1	0	2	6p21.33
RAPGEF3	0	0	0	1	1	2	12q13.11
CTF1	0	0	0	1	1	2	16p11.2
PALMD	0	0	0	1	1	2	1p21.2
GSTA3	0	0	0	1	1	2	6p12.2
MYEOV	0	0	0	1	1	2	11q13.3
GRM8	1	0	0	0	0	1	7q31.33
LRRC4	1	0	0	0	0	1	7q32.1
PDHA1	1	0	0	0	0	1	Xp22.12
AIFM1	1	0	0	0	0	1	Xq26.1
SH3KBP1	1	0	0	0	0	1	Xp22.12
LGI2	1	0	0	0	0	1	4p15.2
REEP1	1	0	0	0	0	1	2p11.2
ZNF467	1	0	0	0	0	1	7q36.1
TNFRSF21	1	0	0	0	0	1	6p12.3
FAM120C	1	0	0	0	0	1	Xp11.22
GLA	1	0	0	0	0	1	Xq22.1
ACSL1	1	0	0	0	0	1	4q35.1
SAP30	1	0	0	0	0	1	4q34.1
GPC4	1	0	0	0	0	1	Xq26.2
UBE2A	1	0	0	0	0	1	Xq24
PRDX4	1	0	0	0	0	1	Xp22.11
COL5A3	1	0	0	0	0	1	19p13.2
CDR2	1	0	0	0	0	1	16p12.2
CCRN4L	1	0	0	0	0	1	4q31.1
PLEKHG6	1	0	0	0	0	1	12p13.31
PPP1R14C	1	0	0	0	0	1	6q25.1
VAV2	1	0	0	0	0	1	9q34.2
FOLH1	1	0	0	0	0	1	11p11.12
SRD5A3	1	0	0	0	0	1	4q12
PPP5C	1	0	0	0	0	1	19q13.32
MAL2	1	0	0	0	0	1	8q24.12
OSBPL6	1	0	0	0	0	1	2q31.2
COL4A2	1	0	0	0	0	1	13q34
SH3RF3	1	0	0	0	0	1	2q12.3
PLXDC1	1	0	0	0	0	1	17q12
GLI2	1	0	0	0	0	1	2q14.2
PITPNM2	1	0	0	0	0	1	12q24.31
PRDM12	1	0	0	0	0	1	9q34.12
TBC1D1	1	0	0	0	0	1	4p14
WNK2	1	0	0	0	0	1	9q22.31
GUCY1A2	1	0	0	0	0	1	11q22.3
GRIPAP1	1	0	0	0	0	1	Xp11.23
ROR1	1	0	0	0	0	1	1p31.3
COL4A1	1	0	0	0	0	1	13q34
UNC5D	1	0	0	0	0	1	8p12
CAPS	1	0	0	0	0	1	19p13.3
TSC22D1	1	0	0	0	0	1	13q14.11
AAK1	1	0	0	0	0	1	2p13.3
SLC39A8	1	0	0	0	0	1	4q24
DYSF	1	0	0	0	0	1	2p13.2
MANBA	1	0	0	0	0	1	4q24
SOCS2	1	0	0	0	0	1	12q22
DOK6	1	0	0	0	0	1	18q22.2
SLCO3A1	1	0	0	0	0	1	15q26.1
SSPO	1	0	0	0	0	1	7q36.1
S100A3	1	0	0	0	0	1	1q21.3
POLA1	1	0	0	0	0	1	Xp22.11
SHISA2	1	0	0	0	0	1	13q12.13
C8G	1	0	0	0	0	1	9q34.3
FILIP1	1	0	0	0	0	1	6q14.1
DDAH1	1	0	0	0	0	1	1p22.3
SLC22A23	1	0	0	0	0	1	6p25.2
FOXF1	1	0	0	0	0	1	16q24.1
ALG2	1	0	0	0	0	1	9q22.33
ARHGAP10	1	0	0	0	0	1	4q31.23
OLFML2B	1	0	0	0	0	1	1q23.3
SPRY4	1	0	0	0	0	1	5q31.3
QDPR	1	0	0	0	0	1	4p15.32
FRY	1	0	0	0	0	1	13q13.1
KLHL30	1	0	0	0	0	1	2q37.3
SH2D5	1	0	0	0	0	1	1p36.12
IRX1	1	0	0	0	0	1	5p15.33
SLC38A8	1	0	0	0	0	1	16q23.3
GRIN2A	1	0	0	0	0	1	16p13.2
TRIM67	1	0	0	0	0	1	1q42.2
IL3RA	1	0	0	0	0	1	Xp22.33
HIGD1B	1	0	0	0	0	1	17q21.31
C1orf21	1	0	0	0	0	1	1q25.3
CDCA7	1	0	0	0	0	1	2q31.1
GLIS2	1	0	0	0	0	1	16p13.3
STOM	1	0	0	0	0	1	9q33.2
LTBR	1	0	0	0	0	1	12p13.31
SCN1B	1	0	0	0	0	1	19q13.12
KL	1	0	0	0	0	1	13q13.1
SLC1A1	1	0	0	0	0	1	9p24.2
HS3ST3B1	1	0	0	0	0	1	17p12
AMMECR1	1	0	0	0	0	1	Xq23
COBL	1	0	0	0	0	1	7p12.1
SORL1	1	0	0	0	0	1	11q24.1
SHROOM4	1	0	0	0	0	1	Xp11.22
HCN2	1	0	0	0	0	1	19p13.3
NEURL1B	1	0	0	0	0	1	5q35.1
CATSPER3	1	0	0	0	0	1	5q31.1
KCTD8	1	0	0	0	0	1	4p13
TEX11	1	0	0	0	0	1	Xq13.1
NFU1	1	0	0	0	0	1	2p13.3
LINC00494	1	0	0	0	0	1	20q13.13
DERA	1	0	0	0	0	1	12p12.3
MGC16275	1	0	0	0	0	1	17q25.1
TEKT3	1	0	0	0	0	1	17p12
ABCB5	1	0	0	0	0	1	7p21.1
FAM86B1	1	0	0	0	0	1	8p23.1
PMP22	1	0	0	0	0	1	17p12
TRIB2	1	0	0	0	0	1	2p24.3
NTNG1	1	0	0	0	0	1	1p13.3
NIPSNAP1	1	0	0	0	0	1	22q12.2
SNAI2	1	0	0	0	0	1	8q11.21
RNASE4	1	0	0	0	0	1	14q11.2
RABL2A	1	0	0	0	0	1	2q13
IRF2BP2	1	0	0	0	0	1	1q42.3
SLCO4A1-AS1	1	0	0	0	0	1	20q13.33
RPL23AP7	1	0	0	0	0	1	2q13
CLDN7	1	0	0	0	0	1	17p13.1
DNAI1	1	0	0	0	0	1	9p13.3
LRRC48	1	0	0	0	0	1	17p11.2
TPT1-AS1	1	0	0	0	0	1	13q14.13
TMEM25	1	0	0	0	0	1	11q23.3
ZNF394	1	0	0	0	0	1	7q22.1
TRIOBP	1	0	0	0	0	1	22q13.1
FMO4	1	0	0	0	0	1	1q24.3
KLK13	1	0	0	0	0	1	19q13.41
CDK15	1	0	0	0	0	1	2q33.1
GRTP1	1	0	0	0	0	1	13q34
PGS1	1	0	0	0	0	1	17q25.3
NARF	1	0	0	0	0	1	17q25.3
ADRB2	1	0	0	0	0	1	5q32
PRRT4	1	0	0	0	0	1	7q32.1
CDC42BPG	1	0	0	0	0	1	11q13.1
RTP3	1	0	0	0	0	1	3p21.31
TPTE2P3	1	0	0	0	0	1	13q14.3
MPZ	1	0	0	0	0	1	1q23.3
PPP1R3B	1	0	0	0	0	1	8p23.1
NRP2	1	0	0	0	0	1	2q33.3
C17orf100	1	0	0	0	0	1	17p13.1
CELSR3	1	0	0	0	0	1	3p21.31
CCDC115	1	0	0	0	0	1	2q21.1
NCKAP5	1	0	0	0	0	1	2q21.2
STAR	1	0	0	0	0	1	8p11.23
TPD52L2	1	0	0	0	0	1	20q13.33
SLC5A5	1	0	0	0	0	1	19p13.11
RNF122	1	0	0	0	0	1	8p12
SNX15	1	0	0	0	0	1	11q13.1
GIPC3	1	0	0	0	0	1	19p13.3
POP5	1	0	0	0	0	1	12q24.31
EDNRB	1	0	0	0	0	1	13q22.3
OR2B11	1	0	0	0	0	1	1q44
NUDT16	0	0	1	0	0	1	3q22.1
SNX3	0	0	1	0	0	1	6q21
SF3A3	0	0	1	0	0	1	1p34.3
TTC4	0	0	1	0	0	1	1p32.3
TRAPPC3	0	0	1	0	0	1	1p34.3
HDDC2	0	0	1	0	0	1	6q22.31
AK2	0	0	1	0	0	1	1p35.1
KIF9	0	0	1	0	0	1	3p21.31
LOC401052	0	0	1	0	0	1	3p25.3
TCP1	0	0	1	0	0	1	6q25.3
RRAGD	0	0	1	0	0	1	6q15
AIG1	0	0	1	0	0	1	6q24.2
KAZN	0	0	1	0	0	1	1p36.21
FBXO42	0	0	1	0	0	1	1p36.13
CHCHD4	0	0	1	0	0	1	3p25.1
YIPF1	0	0	1	0	0	1	1p32.3
PREP	0	0	1	0	0	1	6q21
MRTO4	0	0	1	0	0	1	1p36.13
MEAF6	0	0	1	0	0	1	1p34.3
HEBP2	0	0	1	0	0	1	6q23.3
C6orf203	0	0	1	0	0	1	6q21
PEX7	0	0	1	0	0	1	6q23.3
NFYC	0	0	1	0	0	1	1p34.2
TBP	0	0	1	0	0	1	6q27
DALRD3	0	0	1	0	0	1	3p21.31
RTN4IP1	0	0	1	0	0	1	6q21
BSDC1	0	0	1	0	0	1	1p35.1
PRPF38A	0	0	1	0	0	1	1p32.3
LRRC42	0	0	1	0	0	1	1p32.3
RPA2	0	0	1	0	0	1	1p35.3
MRPL18	0	0	1	0	0	1	6q25.3
CDC42	0	0	1	0	0	1	1p36.12
IFT122	0	0	1	0	0	1	3q21.3
HDAC1	0	0	1	0	0	1	1p35.1
HMGN3	0	0	1	0	0	1	6q14.1
CSDE1	0	0	1	0	0	1	1p13.2
PSMB2	0	0	1	0	0	1	1p34.3
PDCD2	0	0	1	0	0	1	6q27
CAND2	0	0	1	0	0	1	3p25.2
SLC25A33	0	0	1	0	0	1	1p36.22
MRPL20-AS1	0	0	1	0	0	1	1p36.33
KIAA0319L	0	0	1	0	0	1	1p34.3
PSMB1	0	0	1	0	0	1	6q27
CPT2	0	0	1	0	0	1	1p32.3
TCEB3	0	0	1	0	0	1	1p36.11
RNF220	0	0	1	0	0	1	1p34.1
FOXJ3	0	0	1	0	0	1	1p34.2
KPNA6	0	0	1	0	0	1	1p35.1
TSPYL4	0	0	1	0	0	1	6q22.1
COG4	0	0	1	0	0	1	16q22.1
FYN	0	0	1	0	0	1	6q21
TMEM42	0	0	1	0	0	1	3p21.31
UBE2E1	0	0	1	0	0	1	3p24.3
NDUFAF4	0	0	1	0	0	1	6q16.1
PHC2	0	0	1	0	0	1	1p35.1
HECA	0	0	1	0	0	1	6q24.1
TMCO4	0	0	1	0	0	1	1p36.13
CAMK1	0	0	1	0	0	1	3p25.3
WDR77	0	0	1	0	0	1	1p13.2
RPL35A	0	0	1	0	0	1	3q29
YBX1	0	0	1	0	0	1	1p34.2
PHACTR4	0	0	1	0	0	1	1p35.3
PPIH	0	0	1	0	0	1	1p34.2
MTOR	0	0	1	0	0	1	1p36.22
NME6	0	0	1	0	0	1	3p21.31
SEC22C	0	0	1	0	0	1	3p22.1
TXNDC12	0	0	1	0	0	1	1p32.3
NECAP2	0	0	1	0	0	1	1p36.13
CRTAP	0	0	1	0	0	1	3p22.3
PARK2	0	0	1	0	0	1	6q26
MAPKAPK3	0	0	1	0	0	1	3p21.2
KARS	0	0	1	0	0	1	16q23.1
PRDM2	0	0	1	0	0	1	1p36.21
RPL32	0	0	1	0	0	1	3p25.2
DNAJC16	0	0	1	0	0	1	1p36.21
RPL15	0	0	1	0	0	1	3p24.2
NMNAT1	0	0	1	0	0	1	1p36.22
QARS1	0	0	1	0	0	1	3p21.31
LUZP1	0	0	1	0	0	1	1p36.12
PTGFRN	0	0	1	0	0	1	1p13.1
SERP1	0	0	1	0	0	1	3q25.1
RWDD1	0	0	1	0	0	1	6q22.1
TMEM59	0	0	1	0	0	1	1p32.3
REPS1	0	0	1	0	0	1	6q24.1
EPM2A	0	0	1	0	0	1	6q24.3
TXLNA	0	0	1	0	0	1	1p35.1
PIGZ	0	0	1	0	0	1	3q29
SMAP1	0	0	1	0	0	1	6q13
C1orf50	0	0	1	0	0	1	1p34.2
MFN2	0	0	1	0	0	1	1p36.22
VAMP3	0	0	1	0	0	1	1p36.23
CAMTA1	0	0	1	0	0	1	1p36.31
PRKCZ	0	0	1	0	0	1	1p36.33
DPH5	0	0	1	0	0	1	1p21.2
ICMT	0	0	1	0	0	1	1p36.31
PPIE	0	0	1	0	0	1	1p34.2
QRSL1	0	0	1	0	0	1	6q21
GABARAPL2	0	0	1	0	0	1	16q23.1
NMNAT3	0	0	1	0	0	1	3q23
HSF2	0	0	1	0	0	1	6q22.31
SNIP1	0	0	1	0	0	1	1p34.3
YRDC	0	0	1	0	0	1	1p34.3
SPSB1	0	0	1	0	0	1	1p36.22
GPATCH3	0	0	1	0	0	1	1p36.11
EIF2B3	0	0	1	0	0	1	1p34.1
DPH2	0	0	1	0	0	1	1p34.1
IQCC	0	0	1	0	0	1	1p35.1
MBTPS1	0	0	1	0	0	1	16q23.3
NSUN4	0	0	1	0	0	1	1p33
ADPRH	0	0	1	0	0	1	3q13.33
CCDC23	0	0	1	0	0	1	1p34.2
SUMF1	0	0	1	0	0	1	3p26.1
TNFRSF14	0	0	1	0	0	1	1p36.32
TAB2	0	0	1	0	0	1	6q25.1
ZDHHC14	0	0	1	0	0	1	6q25.3
OSBPL9	0	0	1	0	0	1	1p32.3
GMPS	0	0	1	0	0	1	3q25.31
XKR8	0	0	1	0	0	1	1p35.3
INPP5B	0	0	1	0	0	1	1p34.3
NADK	0	0	1	0	0	1	1p36.33
TMEM167B	0	0	1	0	0	1	1p13.3
RPSA	0	0	1	0	0	1	3p22.1
CC2D1B	0	0	1	0	0	1	1p32.3
C1orf216	0	0	1	0	0	1	1p34.3
POMGNT1	0	0	1	0	0	1	1p34.1
DDOST	0	0	1	0	0	1	1p36.12
MAP3K4	0	0	1	0	0	1	6q26
ERMAP	0	0	1	0	0	1	1p34.2
MKNK1	0	0	1	0	0	1	1p33
AKIRIN2	0	0	1	0	0	1	6q15
SCMH1	0	0	1	0	0	1	1p34.2
TRAF3IP2	0	0	1	0	0	1	6q21
TBPL1	0	0	1	0	0	1	6q23.2
SF3B5	0	0	1	0	0	1	6q24.2
EXOSC10	0	0	1	0	0	1	1p36.22
PANK4	0	0	1	0	0	1	1p36.32
PRDX1	0	0	1	0	0	1	1p34.1
PNRC1	0	0	1	0	0	1	6q15
MYCBP	0	0	1	0	0	1	1p34.3
FUCA2	0	0	1	0	0	1	6q24.2
UBE4B	0	0	1	0	0	1	1p36.22
MCM2	0	0	1	0	0	1	3q21.3
SETD5	0	0	1	0	0	1	3p25.3
VPRBP	0	0	1	0	0	1	3p21.2
LINC01128	0	0	1	0	0	1	1p36.33
PCOLCE2	0	0	1	0	0	1	3q23
UBE2J2	0	0	1	0	0	1	1p36.33
ZBTB40	0	0	1	0	0	1	1p36.12
ZNF619	0	0	1	0	0	1	3p22.1
UBXN10	0	0	1	0	0	1	1p36.12
KDM4A	0	0	1	0	0	1	1p34.1
WDR63	0	0	1	0	0	1	1p22.3
RPF2	0	0	1	0	0	1	6q21
RAB32	0	0	1	0	0	1	6q24.3
FAF1	0	0	1	0	0	1	1p32.3
LDLRAP1	0	0	1	0	0	1	1p36.11
IGSF3	0	0	1	0	0	1	1p13.1
SFMBT1	0	0	1	0	0	1	3p21.1
EIF3I	0	0	1	0	0	1	1p35.1
CYB561D1	0	0	1	0	0	1	1p13.3
TPRG1L	0	0	1	0	0	1	1p36.32
TM2D1	0	0	1	0	0	1	1p31.3
APEH	0	0	1	0	0	1	3p21.31
DHX30	0	0	1	0	0	1	3p21.31
SERBP1	0	0	1	0	0	1	1p31.3
FTO	0	0	1	0	0	1	16q12.2
RPL24	0	0	1	0	0	1	3q12.3
SNRNP40	0	0	1	0	0	1	1p35.2
MED8	0	0	1	0	0	1	1p34.2
PLXNA1	0	0	1	0	0	1	3q21.3
ZNF436	0	0	1	0	0	1	1p36.12
RSPH3	0	0	1	0	0	1	6q25.3
TRIT1	0	0	1	0	0	1	1p34.2
CFDP1	0	0	1	0	0	1	16q23.1
RNF146	0	0	1	0	0	1	6q22.33
ALG6	0	0	1	0	0	1	1p31.3
CTNNBIP1	0	0	1	0	0	1	1p36.22
SMPD2	0	0	1	0	0	1	6q21
NDUFB4	0	0	1	0	0	1	3q13.33
UQCRH	0	0	1	0	0	1	1p34.1
TNK2	0	0	1	0	0	1	3q29
VPS13D	0	0	1	0	0	1	1p36.22
COQ3	0	0	1	0	0	1	6q16.2
LRP11	0	0	1	0	0	1	6q25.1
GPR27	0	0	1	0	0	1	3p13
GDAP2	0	0	1	0	0	1	1p12
OSCP1	0	0	1	0	0	1	1p34.3
GTF3C6	0	0	1	0	0	1	6q21
LRRC47	0	0	1	0	0	1	1p36.32
EBNA1BP2	0	0	1	0	0	1	1p34.2
MAGOH	0	0	1	0	0	1	1p32.3
C1orf159	0	0	1	0	0	1	1p36.33
PAFAH2	0	0	1	0	0	1	1p36.11
CAP1	0	0	1	0	0	1	1p34.2
KTI12	0	0	1	0	0	1	1p32.3
NKIRAS1	0	0	1	0	0	1	3p24.2
MTF1	0	0	1	0	0	1	1p34.3
EXOSC6	0	0	1	0	0	1	16q22.1
UST	0	0	1	0	0	1	6q25.1
NRD1	0	0	1	0	0	1	1p32.3
THRAP3	0	0	1	0	0	1	1p34.3
ATPAF1	0	0	1	0	0	1	1p33
PNRC2	0	0	1	0	0	1	1p36.11
CCNC	0	0	1	0	0	1	6q16.2
RPF1	0	0	1	0	0	1	1p22.3
ZNF691	0	0	1	0	0	1	1p34.2
RBBP4	0	0	1	0	0	1	1p35.1
MRPS25	0	0	1	0	0	1	3p25.1
TESK2	0	0	1	0	0	1	1p34.1
SYF2	0	0	1	0	0	1	1p36.11
TSPYL1	0	0	1	0	0	1	6q22.1
SARS	0	0	1	0	0	1	1p13.3
GPX7	0	0	1	0	0	1	1p32.3
IFFO2	0	0	1	0	0	1	1p36.13
IFRD2	0	0	1	0	0	1	3p21.31
ZDHHC18	0	0	1	0	0	1	1p36.11
EEFSEC	0	0	1	0	0	1	3q21.3
CCDC28A	0	0	1	0	0	1	6q24.1
PIK3CD	0	0	1	0	0	1	1p36.22
TMEM44	0	0	1	0	0	1	3q29
ZNF589	0	0	1	0	0	1	3p21.31
CYB5B	0	0	1	0	0	1	16q22.1
VTA1	0	0	1	0	0	1	6q24.1
DDX19A	0	0	1	0	0	1	16q22.1
PPP1R8	0	0	1	0	0	1	1p35.3
SCAP	0	0	1	0	0	1	3p21.31
EPB41	0	0	1	0	0	1	1p35.3
HMGCL	0	0	1	0	0	1	1p36.11
DYNLT1	0	0	1	0	0	1	6q25.3
STX7	0	0	1	0	0	1	6q23.2
KLHL21	0	0	1	0	0	1	1p36.31
ZFYVE9	0	0	1	0	0	1	1p32.3
DENND2D	0	0	1	0	0	1	1p13.3
DEF8	0	0	1	0	0	1	16q24.3
SYCE1L	0	0	1	0	0	1	16q23.1
NBPF1	0	0	1	0	0	1	1p36.13
HSBP1	0	0	1	0	0	1	16q23.3
GPR62	0	0	1	0	0	1	3p21.2
MON1A	0	0	1	0	0	1	3p21.31
PSMD2	0	0	1	0	0	1	3q27.1
ZFPM1	0	0	1	0	0	1	16q24.2
JAGN1	0	0	1	0	0	1	3p25.3
KIAA0226	0	0	1	0	0	1	3q29
HDAC11	0	0	1	0	0	1	3p25.1
LMO4	0	0	1	0	0	1	1p22.3
AKAP7	0	0	1	0	0	1	6q23.2
ARID1A	0	0	1	0	0	1	1p36.11
CASP9	0	0	1	0	0	1	1p36.21
TRNAU1AP	0	0	1	0	0	1	1p35.3
ARL8B	0	0	1	0	0	1	3p26.1
CMPK1	0	0	1	0	0	1	1p33
LRCH3	0	0	1	0	0	1	3q29
RAP1A	0	0	1	0	0	1	1p13.2
MAD2L2	0	0	1	0	0	1	1p36.22
EIF4G1	0	0	1	0	0	1	3q27.1
VANGL1	0	0	1	0	0	1	1p13.1
HINT3	0	0	1	0	0	1	6q22.32
BDH1	0	0	1	0	0	1	3q29
LZIC	0	0	1	0	0	1	1p36.22
FAM120B	0	0	1	0	0	1	6q27
ATG7	0	0	1	0	0	1	3p25.3
ARMC2	0	0	1	0	0	1	6q21
CCBL2	0	0	1	0	0	1	1p22.2
C16orf46	0	0	1	0	0	1	16q23.2
CNKSR3	0	0	1	0	0	1	6q25.2
ATP5F1	0	0	1	0	0	1	1p13.2
IRAK1BP1	0	0	1	0	0	1	6q14.1
TAF1C	0	0	1	0	0	1	16q24.1
CPSF3L	0	0	1	0	0	1	1p36.33
KIAA1522	0	0	1	0	0	1	1p35.1
RPL14	0	0	1	0	0	1	3p22.1
RPL22	0	0	1	0	0	1	1p36.31
POPDC3	0	0	1	0	0	1	6q21
KATNA1	0	0	1	0	0	1	6q25.1
TMEM50A	0	0	1	0	0	1	1p36.11
PHF13	0	0	1	0	0	1	1p36.31
POLR2H	0	0	1	0	0	1	3q27.1
C1orf123	0	0	1	0	0	1	1p32.3
PEF1	0	0	1	0	0	1	1p35.2
PARP3	0	0	1	0	0	1	3p21.2
SLC35E2B	0	0	1	0	0	1	1p36.33
NHSL1	0	0	1	0	0	1	6q23.3
GALE	0	0	1	0	0	1	1p36.11
RPUSD3	0	0	1	0	0	1	3p25.3
PDPR	0	0	1	0	0	1	16q22.1
IP6K1	0	0	1	0	0	1	3p21.31
MTRF1L	0	0	1	0	0	1	6q25.2
PTP4A2	0	0	1	0	0	1	1p35.2
ZBTB47	0	0	1	0	0	1	3p22.1
IQSEC1	0	0	1	0	0	1	3p25.2
FGGY	0	0	1	0	0	1	1p32.1
MTHFR	0	0	1	0	0	1	1p36.22
KLHL36	0	0	1	0	0	1	16q24.1
DIRC2	0	0	1	0	0	1	3q21.1
AMD1	0	0	1	0	0	1	6q21
WDR78	0	0	1	0	0	1	1p31.3
BCKDHB	0	0	1	0	0	1	6q14.1
PRMT6	0	0	1	0	0	1	1p13.3
ABHD6	0	0	1	0	0	1	3p14.3
GPR156	0	0	1	0	0	1	3q13.33
CAPZB	0	0	1	0	0	1	1p36.13
C1orf122	0	0	1	0	0	1	1p34.3
RFWD3	0	0	1	0	0	1	16q23.1
LSM10	0	0	1	0	0	1	1p34.3
RMND1	0	0	1	0	0	1	6q25.1
UBIAD1	0	0	1	0	0	1	1p36.22
ARID1B	0	0	1	0	0	1	6q25.3
HACE1	0	0	1	0	0	1	6q16.3
RRAGC	0	0	1	0	0	1	1p34.3
RCC2	0	0	1	0	0	1	1p36.13
UQCRHL	0	0	1	0	0	1	1p36.21
HRASLS	0	0	1	0	0	1	3q29
HMGN2	0	0	1	0	0	1	1p36.11
ZNRF1	0	0	1	0	0	1	16q23.1
GLG1	0	0	1	0	0	1	16q23.1
TRAIP	0	0	1	0	0	1	3p21.31
RPS8	0	0	1	0	0	1	1p34.1
SCP2	0	0	1	0	0	1	1p32.3
TRIM63	0	0	1	0	0	1	1p36.11
PLOD1	0	0	1	0	0	1	1p36.22
FXR1	0	0	1	0	0	1	3q26.33
STX12	0	0	1	0	0	1	1p35.3
MLF1	0	0	1	0	0	1	3q25.32
PSMA5	0	0	1	0	0	1	1p13.3
TFAP2E	0	0	1	0	0	1	1p34.3
KCTD6	0	0	1	0	0	1	3p14.3
RPS12	0	0	1	0	0	1	6q23.2
LZTFL1	0	0	1	0	0	1	3p21.31
STK40	0	0	1	0	0	1	1p34.3
TERF2IP	0	0	1	0	0	1	16q23.1
VAC14	0	0	1	0	0	1	16q22.1
C1orf228	0	0	1	0	0	1	1p34.1
CEPT1	0	0	1	0	0	1	1p13.3
GNAI3	0	0	1	0	0	1	1p13.3
NOC2L	0	0	1	0	0	1	1p36.33
ABHD14B	0	0	1	0	0	1	3p21.2
HBS1L	0	0	1	0	0	1	6q23.3
SLC16A10	0	0	1	0	0	1	6q21
LRIG2	0	0	1	0	0	1	1p13.2
SESN1	0	0	1	0	0	1	6q21
DPH3	0	0	1	0	0	1	3p25.1
HDAC2	0	0	1	0	0	1	6q21
HIVEP2	0	0	1	0	0	1	6q24.2
NIT2	0	0	1	0	0	1	3q12.2
PPIL6	0	0	1	0	0	1	6q21
ATRIP	0	0	1	0	0	1	3p21.31
FIG4	0	0	1	0	0	1	6q21
ADPRHL2	0	0	1	0	0	1	1p34.3
NEK11	0	0	1	0	0	1	3q22.1
MPHOSPH6	0	0	1	0	0	1	16q23.3
FBXO44	0	0	1	0	0	1	1p36.22
BTF3L4	0	0	1	0	0	1	1p32.3
MRPL20	0	0	1	0	0	1	1p36.33
RAB5A	0	0	1	0	0	1	3p24.3
EPHA2	0	0	1	0	0	1	1p36.13
DOPEY1	0	0	1	0	0	1	6q14.1
WDR59	0	0	1	0	0	1	16q23.1
ARPC4	0	0	1	0	0	1	3p25.3
GLB1	0	0	1	0	0	1	3p22.3
LINC00602	0	0	1	0	0	1	6q27
DDX19B	0	0	1	0	0	1	16q22.1
RHOA	0	0	1	0	0	1	3p21.31
RNF11	0	0	1	0	0	1	1p32.3
PCMT1	0	0	1	0	0	1	6q25.1
DNAJC8	0	0	1	0	0	1	1p35.3
RNF19B	0	0	1	0	0	1	1p35.1
ARHGEF10L	0	0	1	0	0	1	1p36.13
ZBTB48	0	0	1	0	0	1	1p36.31
ZFYVE20	0	0	1	0	0	1	3p25.1
DRAM2	0	0	1	0	0	1	1p13.3
PABPC4	0	0	1	0	0	1	1p34.3
TAF12	0	0	1	0	0	1	1p35.3
RPP14	0	0	1	0	0	1	3p14.3
FOXO3	0	0	1	0	0	1	6q21
RWDD2A	0	0	1	0	0	1	6q14.2
NUDT7	0	0	1	0	0	1	16q23.1
RWDD3	0	0	1	0	0	1	1p21.3
LRRC8C	0	0	1	0	0	1	1p22.2
CIRH1A	0	0	1	0	0	1	16q22.1
BEND5	0	0	1	0	0	1	1p33
MRPL3	0	0	1	0	0	1	3q22.1
PDHB	0	0	1	0	0	1	3p14.3
EIF4E3	0	0	1	0	0	1	3p13
WASF2	0	0	1	0	0	1	1p36.11
TIPARP-AS1	0	0	1	0	0	1	3q25.31
CNBP	0	0	1	0	0	1	3q21.3
RRP9	0	0	1	0	0	1	3p21.2
FBXL4	0	0	1	0	0	1	6q16.1
SPEN	0	0	1	0	0	1	1p36.21
RASSF1	0	0	1	0	0	1	3p21.31
AKIRIN1	0	0	1	0	0	1	1p34.3
NCBP2	0	0	1	0	0	1	3q29
ELOVL1	0	0	1	0	0	1	1p34.2
NOL9	0	0	1	0	0	1	1p36.31
SRRM1	0	0	1	0	0	1	1p36.11
ABCF3	0	0	1	0	0	1	3q27.1
NGLY1	0	0	1	0	0	1	3p24.2
GNG5	0	0	1	0	0	1	1p22.3
MSL2	0	0	1	0	0	1	3q22.3
UTP11L	0	0	1	0	0	1	1p34.3
EEF1A1	0	0	1	0	0	1	6q13
PER3	0	0	1	0	0	1	1p36.23
SDHB	0	0	1	0	0	1	1p36.13
PGM3	0	0	1	0	0	1	6q14.1
PDSS2	0	0	1	0	0	1	6q21
RCC1	0	0	1	0	0	1	1p35.3
PLSCR4	0	0	1	0	0	1	3q24
PIGV	0	0	1	0	0	1	1p36.11
ANKRD6	0	0	1	0	0	1	6q15
COX4I1	0	0	1	0	0	1	16q24.1
BVES	0	0	1	0	0	1	6q21
UBE2E2	0	0	1	0	0	1	3p24.3
LMBRD1	0	0	1	0	0	1	6q13
DNAJC11	0	0	1	0	0	1	1p36.31
USP10	0	0	1	0	0	1	16q24.1
RSC1A1	0	0	1	0	0	1	1p36.21
C16orf74	0	0	1	0	0	1	16q24.1
GPD1L	0	0	1	0	0	1	3p22.3
WWOX	0	0	1	0	0	1	16q23.1
RFT1	0	0	1	0	0	1	3p21.1
RARB	0	0	1	0	0	1	3p24.2
ZMPSTE24	0	0	1	0	0	1	1p34.2
CYB5RL	0	0	1	0	0	1	1p32.3
PARS2	0	0	1	0	0	1	1p32.3
RER1	0	0	1	0	0	1	1p36.32
RPS6KA1	0	0	1	0	0	1	1p36.11
MFSD1	0	0	1	0	0	1	3q25.32
C6orf57	0	0	1	0	0	1	6q13
MED18	0	0	1	0	0	1	1p35.3
TRAK1	0	0	1	0	0	1	3p22.1
DVL1	0	0	1	0	0	1	1p36.33
SLC9A1	0	0	1	0	0	1	1p36.11
CDK10	0	0	1	0	0	1	16q24.3
UBR4	0	0	1	0	0	1	1p36.13
RPL29	0	0	1	0	0	1	3p21.2
FGFR1OP	0	0	1	0	0	1	6q27
GPR157	0	0	1	0	0	1	1p36.23
RARS2	0	0	1	0	0	1	6q15
MDN1	0	0	1	0	0	1	6q15
USP48	0	0	1	0	0	1	1p36.12
PKD1L2	0	0	1	0	0	1	16q23.2
COX7A2	0	0	1	0	0	1	6q14.1
GTPBP8	0	0	1	0	0	1	3q13.2
SLC16A1	0	0	1	0	0	1	1p13.2
HSPB11	0	0	1	0	0	1	1p32.3
MRPS15	0	0	1	0	0	1	1p34.3
SERAC1	0	0	1	0	0	1	6q25.3
ZCCHC17	0	0	1	0	0	1	1p35.2
GALNS	0	0	1	0	0	1	16q24.3
MYD88	0	0	1	0	0	1	3p22.2
DMAP1	0	0	1	0	0	1	1p34.1
HP1BP3	0	0	1	0	0	1	1p36.12
PSRC1	0	0	1	0	0	1	1p13.3
ECT2L	0	0	1	0	0	1	6q24.1
FRK	0	0	1	0	0	1	6q22.1
MBD4	0	0	1	0	0	1	3q21.3
JAK1	0	0	1	0	0	1	1p31.3
DNAJC19	0	0	1	0	0	1	3q26.33
RSBN1	0	0	1	0	0	1	1p13.2
PPT1	0	0	1	0	0	1	1p34.2
GFM1	0	0	1	0	0	1	3q25.32
TNFRSF14-AS1	0	0	1	0	0	1	1p36.32
RPL11	0	0	1	0	0	1	1p36.11
FBXO6	0	0	1	0	0	1	1p36.22
MON1B	0	0	1	0	0	1	16q23.1
GTF2B	0	0	1	0	0	1	1p22.2
SF3B3	0	0	1	0	0	1	16q22.1
DFFA	0	0	1	0	0	1	1p36.22
VGLL4	0	0	1	0	0	1	3p25.3
OXSM	0	0	1	0	0	1	3p24.2
UBXN11	0	0	1	0	0	1	1p36.11
ATXN7L2	0	0	1	0	0	1	1p13.3
NT5DC1	0	0	1	0	0	1	6q22.1
ATG4C	0	0	1	0	0	1	1p31.3
KHDC1	0	0	1	0	0	1	6q13
MACF1	0	0	1	0	0	1	1p34.3
MVD	0	0	1	0	0	1	16q24.3
MORN1	0	0	1	0	0	1	1p36.33
CRELD1	0	0	1	0	0	1	3p25.3
ZNF35	0	0	1	0	0	1	3p21.31
TOE1	0	0	1	0	0	1	1p34.1
DCLRE1B	0	0	1	0	0	1	1p13.2
PAQR7	0	0	1	0	0	1	1p36.11
ATG5	0	0	1	0	0	1	6q21
CTNNB1	0	0	1	0	0	1	3p22.1
MFAP2	0	0	1	0	0	1	1p36.13
ST3GAL3	0	0	1	0	0	1	1p34.1
NDUFB5	0	0	1	0	0	1	3q26.33
PIGK	0	0	1	0	0	1	1p31.1
SDC3	0	0	1	0	0	1	1p35.2
SFT2D1	0	0	1	0	0	1	6q27
ZMYM4	0	0	1	0	0	1	1p34.3
ALX3	0	0	1	0	0	1	1p13.3
ZNF717	0	0	1	0	0	1	3p12.3
GTF2H5	0	0	1	0	0	1	6q25.3
WLS	0	0	1	0	0	1	1p31.3
C1orf174	0	0	1	0	0	1	1p36.32
RAD54L2	0	0	1	0	0	1	3p21.2
PTP4A1	0	0	1	0	0	1	6q12
HECTD3	0	0	1	0	0	1	1p34.1
ZBTB24	0	0	1	0	0	1	6q21
TOMM70A	0	0	1	0	0	1	3q12.2
CDK11B	0	0	1	0	0	1	1p36.33
AP4B1	0	0	1	0	0	1	1p13.2
IL17RE	0	0	1	0	0	1	3p25.3
FLJ30679	0	0	1	0	0	1	16q24.1
SYNCRIP	0	0	1	0	0	1	6q14.3
VILL	0	0	1	0	0	1	3p22.2
TFDP2	0	0	1	0	0	1	3q23
KIAA1244	0	0	1	0	0	1	6q23.3
PPCS	0	0	1	0	0	1	1p34.2
UBE2J1	0	0	1	0	0	1	6q15
SERINC1	0	0	1	0	0	1	6q22.31
FAM69A	0	0	1	0	0	1	1p22.1
H6PD	0	0	1	0	0	1	1p36.22
LTV1	0	0	1	0	0	1	6q24.2
MLYCD	0	0	1	0	0	1	16q23.3
TMEM115	0	0	1	0	0	1	3p21.31
GMEB1	0	0	1	0	0	1	1p35.3
TULP4	0	0	1	0	0	1	6q25.3
PTPN23	0	0	1	0	0	1	3p21.31
CCDC163P	0	0	1	0	0	1	1p34.1
PARK7	0	0	1	0	0	1	1p36.23
ALG14	0	0	1	0	0	1	1p21.3
PRRT3	0	0	1	0	0	1	3p25.3
UROD	0	0	1	0	0	1	1p34.1
PSMD6	0	0	1	0	0	1	3p14.1
AMOTL2	0	0	1	0	0	1	3q22.2
HSDL1	0	0	1	0	0	1	16q23.3
SLC35A5	0	0	1	0	0	1	3q13.2
TPRA1	0	0	1	0	0	1	3q21.3
CLCN6	0	0	1	0	0	1	1p36.22
TUBE1	0	0	1	0	0	1	6q21
OSTM1	0	0	1	0	0	1	6q21
RNF166	0	0	1	0	0	1	16q24.3
SPIRE2	0	0	1	0	0	1	16q24.3
WARS2	0	0	1	0	0	1	1p12
RYBP	0	0	1	0	0	1	3p13
MTHFSD	0	0	1	0	0	1	16q24.1
CD164	0	0	1	0	0	1	6q21
PEX14	0	0	1	0	0	1	1p36.22
ZNF197	0	0	1	0	0	1	3p21.31
CAMK2N1	0	0	1	0	0	1	1p36.12
TMEM69	0	0	1	0	0	1	1p34.1
ZNF778	0	0	1	0	0	1	16q24.3
SPG7	0	0	1	0	0	1	16q24.3
IL17RD	0	0	1	0	0	1	3p14.3
TKT	0	0	1	0	0	1	3p21.1
MICAL1	0	0	1	0	0	1	6q21
MINA	0	0	1	0	0	1	3q11.2
BCAS2	0	0	1	0	0	1	1p13.2
RPN1	0	0	1	0	0	1	3q21.3
CHMP1A	0	0	1	0	0	1	16q24.3
HIPK1	0	0	1	0	0	1	1p13.2
WDR3	0	0	1	0	0	1	1p12
THAP3	0	0	1	0	0	1	1p36.31
LRRC41	0	0	1	0	0	1	1p34.1
PHF10	0	0	1	0	0	1	6q27
SSBP3	0	0	1	0	0	1	1p32.3
ANKRD13C	0	0	1	0	0	1	1p31.1
QKI	0	0	1	0	0	1	6q26
NUP43	0	0	1	0	0	1	6q25.1
PDPR2P	0	0	1	0	0	1	16q23.1
ST3GAL2	0	0	1	0	0	1	16q22.1
CMTM7	0	0	1	0	0	1	3p22.3
ZBTB17	0	0	1	0	0	1	1p36.13
ZMYND12	0	0	1	0	0	1	1p34.2
RNF217	0	0	1	0	0	1	6q22.31
AHCYL1	0	0	1	0	0	1	1p13.3
ATPIF1	0	0	1	0	0	1	1p35.3
ZBTB8OS	0	0	1	0	0	1	1p35.1
PQLC2	0	0	1	0	0	1	1p36.13
DDX20	0	0	1	0	0	1	1p13.2
TBCCD1	0	0	1	0	0	1	3q27.3
ALAS1	0	0	1	0	0	1	3p21.2
OTUD3	0	0	1	0	0	1	1p36.13
ACAP3	0	0	1	0	0	1	1p36.33
CCDC51	0	0	1	0	0	1	3p21.31
AMIGO1	0	0	1	0	0	1	1p13.3
MED23	0	0	1	0	0	1	6q23.2
AGMAT	0	0	1	0	0	1	1p36.21
QTRTD1	0	0	1	0	0	1	3q13.31
PINK1	0	0	1	0	0	1	1p36.12
XPC	0	0	1	0	0	1	3p25.1
CDK11A	0	0	1	0	0	1	1p36.33
ABTB1	0	0	1	0	0	1	3q21.3
PAK2	0	0	1	0	0	1	3q29
RIMS3	0	0	1	0	0	1	1p34.2
DYNLRB2	0	0	1	0	0	1	16q23.2
ANKRD11	0	0	1	0	0	1	16q24.3
GNB1	0	0	1	0	0	1	1p36.33
GNAI2	0	0	1	0	0	1	3p21.31
PEX3	0	0	1	0	0	1	6q24.2
RPAP2	0	0	1	0	0	1	1p22.1
MUL1	0	0	1	0	0	1	1p36.12
ZUFSP	0	0	1	0	0	1	6q22.1
GXYLT2	0	0	1	0	0	1	3p13
CROCC	0	0	1	0	0	1	1p36.13
SLC22A1	0	0	1	0	0	1	6q25.3
C1orf52	0	0	1	0	0	1	1p22.3
GPBP1L1	0	0	1	0	0	1	1p34.1
SLC2A12	0	0	1	0	0	1	6q23.2
ECHDC2	0	0	1	0	0	1	1p32.3
TSC22D2	0	0	1	0	0	1	3q25.1
TMEM57	0	0	1	0	0	1	1p36.11
ZSCAN20	0	0	1	0	0	1	1p35.1
TADA3	0	0	1	0	0	1	3p25.3
CTBS	0	0	1	0	0	1	1p22.3
SEMA3B	0	0	1	0	0	1	3p21.31
FUK	0	0	1	0	0	1	16q22.1
MTSS1L	0	0	1	0	0	1	16q22.1
ATG3	0	0	1	0	0	1	3q13.2
PUM1	0	0	1	0	0	1	1p35.2
CDC25A	0	0	1	0	0	1	3p21.31
PLEKHM2	0	0	1	0	0	1	1p36.21
ASAP3	0	0	1	0	0	1	1p36.12
CSF1	0	0	1	0	0	1	1p13.3
NOB1	0	0	1	0	0	1	16q22.1
KIAA1143	0	0	1	0	0	1	3p21.31
ATP6V0B	0	0	1	0	0	1	1p34.1
TMEM181	0	0	1	0	0	1	6q25.3
CENPW	0	0	1	0	0	1	6q22.32
COMMD2	0	0	1	0	0	1	3q25.1
TMEM45A	0	0	1	0	0	1	3q12.2
IQCB1	0	0	1	0	0	1	3q13.33
ECHDC1	0	0	1	0	0	1	6q22.33
AKR1A1	0	0	1	0	0	1	1p34.1
KIAA2013	0	0	1	0	0	1	1p36.22
PDIK1L	0	0	1	0	0	1	1p36.11
RPL13	0	0	1	0	0	1	16q24.3
THOC7	0	0	1	0	0	1	3p14.1
NFIA	0	0	1	0	0	1	1p31.3
MECR	0	0	1	0	0	1	1p35.3
ZNHIT6	0	0	1	0	0	1	1p22.3
RNGTT	0	0	1	0	0	1	6q15
ZNF362	0	0	1	0	0	1	1p35.1
NAT6	0	0	1	0	0	1	3p21.31
IL17RC	0	0	1	0	0	1	3p25.3
NDUFS5	0	0	1	0	0	1	1p34.3
STX11	0	0	1	0	0	1	6q24.2
RPL32P3	0	0	1	0	0	1	3q21.3
AHI1	0	0	1	0	0	1	6q23.3
YARS	0	0	1	0	0	1	1p35.1
TMEM170A	0	0	1	0	0	1	16q23.1
WDR5B	0	0	1	0	0	1	3q21.1
PACRG	0	0	1	0	0	1	6q26
NRAS	0	0	1	0	0	1	1p13.2
LYPLA2	0	0	1	0	0	1	1p36.11
SLC35D1	0	0	1	0	0	1	1p31.3
ZC3H18	0	0	1	0	0	1	16q24.2
EIF2A	0	0	1	0	0	1	3q25.1
UTRN	0	0	1	0	0	1	6q24.2
DHDDS	0	0	1	0	0	1	1p36.11
AARS	0	0	1	0	0	1	16q22.1
ZBTB20	0	0	1	0	0	1	3q13.31
ECE2	0	0	1	0	0	1	3q27.1
DDI2	0	0	1	0	0	1	1p36.21
SDF4	0	0	1	0	0	1	1p36.33
TMEM51	0	0	1	0	0	1	1p36.21
TERF2	0	0	1	0	0	1	16q22.1
WDTC1	0	0	1	0	0	1	1p36.11
ADAT1	0	0	1	0	0	1	16q23.1
ABCC5	0	0	1	0	0	1	3q27.1
IL1RAP	0	0	1	0	0	1	3q28
TMEM30A	0	0	1	0	0	1	6q14.1
ZNF621	0	0	1	0	0	1	3p22.1
YTHDF2	0	0	1	0	0	1	1p35.3
LDHD	0	0	1	0	0	1	16q23.1
ZNF445	0	0	1	0	0	1	3p21.31
MLH1	0	0	1	0	0	1	3p22.2
EYA3	0	0	1	0	0	1	1p35.3
DNAJC13	0	0	1	0	0	1	3q22.1
ZNF501	0	0	1	0	0	1	3p21.31
AMPD2	0	0	1	0	0	1	1p13.3
SSU72	0	0	1	0	0	1	1p36.33
BCAR1	0	0	1	0	0	1	16q23.1
TRAPPC2L	0	0	1	0	0	1	16q24.3
MLLT4	0	0	1	0	0	1	6q27
SENP5	0	0	1	0	0	1	3q29
PLCL2	0	0	1	0	0	1	3p24.3
NUS1	0	0	1	0	0	1	6q22.1
EIF4G3	0	0	1	0	0	1	1p36.12
CHCHD6	0	0	1	0	0	1	3q21.3
STIL	0	0	1	0	0	1	1p33
TYW3	0	0	1	0	0	1	1p31.1
SASH1	0	0	1	0	0	1	6q24.3
ATMIN	0	0	1	0	0	1	16q23.2
KIAA1919	0	0	1	0	0	1	6q21
TTC21A	0	0	1	0	0	1	3p22.2
ACPL2	0	0	1	0	0	1	3q23
MTF2	0	0	1	0	0	1	1p22.1
PHF3	0	0	1	0	0	1	6q12
ATAD3B	0	0	1	0	0	1	1p36.33
IPO13	0	0	1	0	0	1	1p34.1
FPGT	0	0	1	0	0	1	1p31.1
KIAA1009	0	0	1	0	0	1	6q14.2
SLC30A2	0	0	1	0	0	1	1p36.11
MTHFD1L	0	0	1	0	0	1	6q25.1
EXTL2	0	0	1	0	0	1	1p21.2
HYI	0	0	1	0	0	1	1p34.2
KCNQ5	0	0	1	0	0	1	6q13
ST6GAL1	0	0	1	0	0	1	3q27.3
IGF2R	0	0	1	0	0	1	6q25.3
IGF2BP2	0	0	1	0	0	1	3q27.2
ZNF276	0	0	1	0	0	1	16q24.3
AGL	0	0	1	0	0	1	1p21.2
OXNAD1	0	0	1	0	0	1	3p25.1
MRPL47	0	0	1	0	0	1	3q26.33
TMEM110	0	0	1	0	0	1	3p21.1
PM20D2	0	0	1	0	0	1	6q15
ACVR2B	0	0	1	0	0	1	3p22.2
IFT57	0	0	1	0	0	1	3q13.12
SNX9	0	0	1	0	0	1	6q25.3
ERI3	0	0	1	0	0	1	1p34.1
GPR3	0	0	1	0	0	1	1p36.11
PLXND1	0	0	1	0	0	1	3q22.1
C6orf120	0	0	1	0	0	1	6q27
RBP7	0	0	1	0	0	1	1p36.22
OMA1	0	0	1	0	0	1	1p32.2
AGBL4	0	0	1	0	0	1	1p33
APPL1	0	0	1	0	0	1	3p14.3
GINS2	0	0	1	0	0	1	16q24.1
ZYG11B	0	0	1	0	0	1	1p32.3
MAP4	0	0	1	0	0	1	3p21.31
LAMA4	0	0	1	0	0	1	6q21
FBXL2	0	0	1	0	0	1	3p22.3
ETV5	0	0	1	0	0	1	3q27.2
SH3GLB1	0	0	1	0	0	1	1p22.3
ZNF620	0	0	1	0	0	1	3p22.1
BCL10	0	0	1	0	0	1	1p22.3
USP24	0	0	1	0	0	1	1p32.3
CDK19	0	0	1	0	0	1	6q21
HYAL1	0	0	1	0	0	1	3p21.31
VPS4A	0	0	1	0	0	1	16q22.1
ALG3	0	0	1	0	0	1	3q27.1
B4GALT4	0	0	1	0	0	1	3q13.32
EFCAB12	0	0	1	0	0	1	3q21.3
FAM184A	0	0	1	0	0	1	6q22.31
MGC2889	0	0	1	0	0	1	3q29
IMPDH2	0	0	1	0	0	1	3p21.31
KCNC4	0	0	1	0	0	1	1p13.3
DCP1A	0	0	1	0	0	1	3p21.1
SKI	0	0	1	0	0	1	1p36.33
CENPBD1	0	0	1	0	0	1	16q24.3
CTU2	0	0	1	0	0	1	16q24.3
HSPBAP1	0	0	1	0	0	1	3q21.1
WWP2	0	0	1	0	0	1	16q22.1
GNG12	0	0	1	0	0	1	1p31.3
LATS1	0	0	1	0	0	1	6q25.1
ODF2L	0	0	1	0	0	1	1p22.3
ADC	0	0	1	0	0	1	1p35.1
ARHGAP31	0	0	1	0	0	1	3q13.33
DAG1	0	0	1	0	0	1	3p21.31
PLA1A	0	0	1	0	0	1	3q13.33
KCNAB2	0	0	1	0	0	1	1p36.31
SLC6A17	0	0	1	0	0	1	1p13.3
THPO	0	0	1	0	0	1	3q27.1
SESN2	0	0	1	0	0	1	1p35.3
LMLN	0	0	1	0	0	1	3q29
MATN1	0	0	1	0	0	1	1p35.2
PLK3	0	0	1	0	0	1	1p34.1
FAM135A	0	0	1	0	0	1	6q13
ZBTB2	0	0	1	0	0	1	6q25.1
C3orf58	0	0	1	0	0	1	3q24
MAP7	0	0	1	0	0	1	6q23.3
NRADDP	0	0	1	0	0	1	3p21.31
ALG1L	0	0	1	0	0	1	3q21.2
NDUFAF3	0	0	1	0	0	1	3p21.31
KIF1B	0	0	1	0	0	1	1p36.22
PIGX	0	0	1	0	0	1	3q29
MAP7D1	0	0	1	0	0	1	1p34.3
RPL5	0	0	1	0	0	1	1p22.1
LOC729603	0	0	1	0	0	1	6q25.3
AHDC1	0	0	1	0	0	1	1p36.11
DNAJB11	0	0	1	0	0	1	3q27.3
RFTN1	0	0	1	0	0	1	3p25.1
DFFB	0	0	1	0	0	1	1p36.32
GPN2	0	0	1	0	0	1	1p36.11
MRPL37	0	0	1	0	0	1	1p32.3
MEGF6	0	0	1	0	0	1	1p36.32
SNHG5	0	0	1	0	0	1	6q14.3
KIF25	0	0	1	0	0	1	6q27
PEX10	0	0	1	0	0	1	1p36.32
TCF25	0	0	1	0	0	1	16q24.3
AZI2	0	0	1	0	0	1	3p24.1
DNAH1	0	0	1	0	0	1	3p21.1
THUMPD3	0	0	1	0	0	1	3p25.3
CCDC24	0	0	1	0	0	1	1p34.1
LCA5	0	0	1	0	0	1	6q14.1
GSTM4	0	0	1	0	0	1	1p13.3
FBXO30	0	0	1	0	0	1	6q24.3
GLT8D1	0	0	1	0	0	1	3p21.1
STMN1	0	0	1	0	0	1	1p36.11
ARIH2	0	0	1	0	0	1	3p21.31
PHACTR2	0	0	1	0	0	1	6q24.2
RNASET2	0	0	1	0	0	1	6q27
AKR7A2	0	0	1	0	0	1	1p36.13
FAM46B	0	0	1	0	0	1	1p36.11
BANP	0	0	1	0	0	1	16q24.2
C1orf109	0	0	1	0	0	1	1p34.3
TMEM39B	0	0	1	0	0	1	1p35.1
EXTL1	0	0	1	0	0	1	1p36.11
ATP1A1	0	0	1	0	0	1	1p13.1
CHTF8	0	0	1	0	0	1	16q22.1
NAA50	0	0	1	0	0	1	3q13.2
GTF2E1	0	0	1	0	0	1	3q13.33
EAF1	0	0	1	0	0	1	3p25.1
SAMD5	0	0	1	0	0	1	6q24.3
GAN	0	0	1	0	0	1	16q23.2
CNTN3	0	0	1	0	0	1	3p12.3
PLEKHG5	0	0	1	0	0	1	1p36.31
DBR1	0	0	1	0	0	1	3q22.3
NEK4	0	0	1	0	0	1	3p21.1
ZNF593	0	0	1	0	0	1	1p36.11
ACSF3	0	0	1	0	0	1	16q24.3
FHIT	0	0	1	0	0	1	3p14.2
ST7L	0	0	1	0	0	1	1p13.2
CELSR2	0	0	1	0	0	1	1p13.3
ZNF697	0	0	1	0	0	1	1p12
TRIM62	0	0	1	0	0	1	1p35.1
GOPC	0	0	1	0	0	1	6q22.1
URAHP	0	0	1	0	0	1	16q24.3
NUDC	0	0	1	0	0	1	1p36.11
MIIP	0	0	1	0	0	1	1p36.22
PRKACB	0	0	1	0	0	1	1p31.1
TRIM59	0	0	1	0	0	1	3q25.33
TCEA3	0	0	1	0	0	1	1p36.12
GBE1	0	0	1	0	0	1	3p12.2
SHISA5	0	0	1	0	0	1	3p21.31
SELK	0	0	1	0	0	1	3p21.1
REV3L	0	0	1	0	0	1	6q21
COG8	0	0	1	0	0	1	16q22.1
DCBLD2	0	0	1	0	0	1	3q12.1
C3orf67	0	0	1	0	0	1	3p14.2
RAB6B	0	0	1	0	0	1	3q22.1
MOV10	0	0	1	0	0	1	1p13.2
CGGBP1	0	0	1	0	0	1	3p11.1
FYCO1	0	0	1	0	0	1	3p21.31
SYNE1	0	0	1	0	0	1	6q25.1
CDC40	0	0	1	0	0	1	6q21
WASF1	0	0	1	0	0	1	6q21
ABHD5	0	0	1	0	0	1	3p21.33
2023-09-15	0	0	1	0	0	1	1p22.3
STXBP5	0	0	1	0	0	1	6q24.3
SEC22A	0	0	1	0	0	1	3q21.1
TPRXL	0	0	1	0	0	1	3p25.1
AKAP12	0	0	1	0	0	1	6q25.1
MYO6	0	0	1	0	0	1	6q14.1
CRYZ	0	0	1	0	0	1	1p31.1
CLCNKB	0	0	1	0	0	1	1p36.13
MAN1C1	0	0	1	0	0	1	1p36.11
S100PBP	0	0	1	0	0	1	1p35.1
IBTK	0	0	1	0	0	1	6q14.1
USP33	0	0	1	0	0	1	1p31.1
MARCKS	0	0	1	0	0	1	6q21
MPL	0	0	1	0	0	1	1p34.2
SENP6	0	0	1	0	0	1	6q14.1
TMEM39A	0	0	1	0	0	1	3q13.33
HS2ST1	0	0	1	0	0	1	1p22.3
B3GALT6	0	0	1	0	0	1	1p36.33
TMEM207	0	0	1	0	0	1	3q28
UBXN7	0	0	1	0	0	1	3q29
HOOK1	0	0	1	0	0	1	1p32.1
COL6A6	0	0	1	0	0	1	3q22.1
KDM1A	0	0	1	0	0	1	1p36.12
SORT1	0	0	1	0	0	1	1p13.3
C6orf58	0	0	1	0	0	1	6q22.33
PODXL2	0	0	1	0	0	1	3q21.3
ABHD10	0	0	1	0	0	1	3q13.2
SOBP	0	0	1	0	0	1	6q21
ERRFI1	0	0	1	0	0	1	1p36.23
WTAP	0	0	1	0	0	1	6q25.3
LEPROT	0	0	1	0	0	1	1p31.3
TMEM231	0	0	1	0	0	1	16q23.1
GADD45A	0	0	1	0	0	1	1p31.3
TRIM45	0	0	1	0	0	1	1p13.1
SLFNL1	0	0	1	0	0	1	1p34.2
SEC61A1	0	0	1	0	0	1	3q21.3
FILIP1L	0	0	1	0	0	1	3q12.1
EPS15	0	0	1	0	0	1	1p32.3
TRIM33	0	0	1	0	0	1	1p13.2
MMEL1	0	0	1	0	0	1	1p36.32
KLHL18	0	0	1	0	0	1	3p21.31
RCAN3	0	0	1	0	0	1	1p36.11
STL	0	0	1	0	0	1	6q22.31
KCND3	0	0	1	0	0	1	1p13.2
CASZ1	0	0	1	0	0	1	1p36.22
ADAMTS9	0	0	1	0	0	1	3p14.1
GNL2	0	0	1	0	0	1	1p34.3
PRKCI	0	0	1	0	0	1	3q26.2
SDR42E1	0	0	1	0	0	1	16q23.3
SLC22A15	0	0	1	0	0	1	1p13.1
PERP	0	0	1	0	0	1	6q23.3
SRGAP3	0	0	1	0	0	1	3p25.3
LYRM2	0	0	1	0	0	1	6q15
FYTTD1	0	0	1	0	0	1	3q29
MAP3K6	0	0	1	0	0	1	1p36.11
EIF5A2	0	0	1	0	0	1	3q26.2
MIER1	0	0	1	0	0	1	1p31.3
ZNF292	0	0	1	0	0	1	6q14.3
TMEM53	0	0	1	0	0	1	1p34.1
KIAA1407	0	0	1	0	0	1	3q13.31
MRAS	0	0	1	0	0	1	3q22.3
ZCCHC11	0	0	1	0	0	1	1p32.3
MIB2	0	0	1	0	0	1	1p36.33
B4GALT2	0	0	1	0	0	1	1p34.1
HCLS1	0	0	1	0	0	1	3q13.33
OGFRL1	0	0	1	0	0	1	6q13
IPP	0	0	1	0	0	1	1p34.1
KIAA1324	0	0	1	0	0	1	1p13.3
SLC35A1	0	0	1	0	0	1	6q15
ACAT2	0	0	1	0	0	1	6q25.3
ASCC3	0	0	1	0	0	1	6q16.3
SPCS1	0	0	1	0	0	1	3p21.1
TTF2	0	0	1	0	0	1	1p13.1
GYG1	0	0	1	0	0	1	3q24
RPL39L	0	0	1	0	0	1	3q27.3
SETD2	0	0	1	0	0	1	3p21.31
RLF	0	0	1	0	0	1	1p34.2
SAMD13	0	0	1	0	0	1	1p31.1
MRAP2	0	0	1	0	0	1	6q14.2
TNFAIP3	0	0	1	0	0	1	6q23.3
COL8A2	0	0	1	0	0	1	1p34.3
ZMAT3	0	0	1	0	0	1	3q26.32
ACADM	0	0	1	0	0	1	1p31.1
DBT	0	0	1	0	0	1	1p21.2
FBXO2	0	0	1	0	0	1	1p36.22
GCSH	0	0	1	0	0	1	16q23.2
SNX14	0	0	1	0	0	1	6q14.3
ZNF684	0	0	1	0	0	1	1p34.2
NMD3	0	0	1	0	0	1	3q26.1
SIKE1	0	0	1	0	0	1	1p13.2
SHPRH	0	0	1	0	0	1	6q24.3
TFB1M	0	0	1	0	0	1	6q25.3
ENO1	0	0	1	0	0	1	1p36.23
RAD18	0	0	1	0	0	1	3p25.3
CDC14A	0	0	1	0	0	1	1p21.2
KPNA5	0	0	1	0	0	1	6q22.1
RHD	0	0	1	0	0	1	1p36.11
ZBTB38	0	0	1	0	0	1	3q23
SLC30A7	0	0	1	0	0	1	1p21.2
SYPL2	0	0	1	0	0	1	1p13.3
MCM9	0	0	1	0	0	1	6q22.31
SPACA1	0	0	1	0	0	1	6q15
HIGD1A	0	0	1	0	0	1	3p22.1
PKN2	0	0	1	0	0	1	1p22.2
C3orf38	0	0	1	0	0	1	3p11.1
ABCD3	0	0	1	0	0	1	1p21.3
CAPN7	0	0	1	0	0	1	3p25.1
C3orf33	0	0	1	0	0	1	3q25.31
TOP2B	0	0	1	0	0	1	3p24.2
HGC6.3	0	0	1	0	0	1	6q27
PLSCR1	0	0	1	0	0	1	3q24
TMCC1	0	0	1	0	0	1	3q22.1
LRRIQ4	0	0	1	0	0	1	3q26.2
DYNC1LI1	0	0	1	0	0	1	3p22.3
HHLA3	0	0	1	0	0	1	1p31.1
PUSL1	0	0	1	0	0	1	1p36.33
GNB4	0	0	1	0	0	1	3q26.33
AGTRAP	0	0	1	0	0	1	1p36.22
PRICKLE2	0	0	1	0	0	1	3p14.1
VCAM1	0	0	1	0	0	1	1p21.2
CNN3	0	0	1	0	0	1	1p21.3
TTLL3	0	0	1	0	0	1	3p25.3
PPIL4	0	0	1	0	0	1	6q25.1
TRMT11	0	0	1	0	0	1	6q22.32
NCDN	0	0	1	0	0	1	1p34.3
ASF1A	0	0	1	0	0	1	6q22.31
CEP63	0	0	1	0	0	1	3q22.2
CNR1	0	0	1	0	0	1	6q15
LINC02035	0	0	1	0	0	1	3q21.1
HYAL3	0	0	1	0	0	1	3p21.31
NCOA7	0	0	1	0	0	1	6q22.32
SYN2	0	0	1	0	0	1	3p25.2
MAP3K7	0	0	1	0	0	1	6q15
BTBD19	0	0	1	0	0	1	1p34.1
PTPRF	0	0	1	0	0	1	1p34.2
RFC4	0	0	1	0	0	1	3q27.3
MAST2	0	0	1	0	0	1	1p34.1
PBRM1	0	0	1	0	0	1	3p21.1
WDR27	0	0	1	0	0	1	6q27
PPARG	0	0	1	0	0	1	3p25.2
PGD	0	0	1	0	0	1	1p36.22
ATXN7	0	0	1	0	0	1	3p14.1
NASP	0	0	1	0	0	1	1p34.1
ZNF662	0	0	1	0	0	1	3p22.1
LRRC58	0	0	1	0	0	1	3q13.33
CCNL2	0	0	1	0	0	1	1p36.33
FBXW12	0	0	1	0	0	1	3p21.31
DCBLD1	0	0	1	0	0	1	6q22.1
SOD2	0	0	1	0	0	1	6q25.3
MUTYH	0	0	1	0	0	1	1p34.1
RNPC3	0	0	1	0	0	1	1p21.1
USP45	0	0	1	0	0	1	6q16.2
PDXDC2P-NPIPB14P	0	0	1	0	0	1	16q22.1
USP1	0	0	1	0	0	1	1p31.3
C6orf211	0	0	1	0	0	1	6q25.1
RNF168	0	0	1	0	0	1	3q29
FLJ37453	0	0	1	0	0	1	1p36.21
GSK3B	0	0	1	0	0	1	3q13.33
THUMPD3-AS1	0	0	1	0	0	1	3p25.3
FLNB	0	0	1	0	0	1	3p14.3
SLC2A1	0	0	1	0	0	1	1p34.2
PTPLB	0	0	1	0	0	1	3q21.1
DR1	0	0	1	0	0	1	1p22.1
PTPRU	0	0	1	0	0	1	1p35.3
RSPH4A	0	0	1	0	0	1	6q22.1
DPYD	0	0	1	0	0	1	1p21.3
HSPG2	0	0	1	0	0	1	1p36.12
HIAT1	0	0	1	0	0	1	1p21.2
FAM76A	0	0	1	0	0	1	1p35.3
FOXP1	0	0	1	0	0	1	3p13
SCHIP1	0	0	1	0	0	1	3q25.32
ZBTB8B	0	0	1	0	0	1	1p35.1
TMEM54	0	0	1	0	0	1	1p35.1
IFNGR1	0	0	1	0	0	1	6q23.3
RNF207	0	0	1	0	0	1	1p36.31
MTO1	0	0	1	0	0	1	6q13
PCNP	0	0	1	0	0	1	3q12.3
EFHD2	0	0	1	0	0	1	1p36.21
DOCK7	0	0	1	0	0	1	1p31.3
SMPDL3A	0	0	1	0	0	1	6q22.31
CLCC1	0	0	1	0	0	1	1p13.3
LDLRAD2	0	0	1	0	0	1	1p36.12
RYK	0	0	1	0	0	1	3q22.2
VHL	0	0	1	0	0	1	3p25.3
TMEM222	0	0	1	0	0	1	1p36.11
ZNF639	0	0	1	0	0	1	3q26.33
MARCKSL1	0	0	1	0	0	1	1p35.1
FAM162A	0	0	1	0	0	1	3q21.1
FAM102B	0	0	1	0	0	1	1p13.3
ZDHHC19	0	0	1	0	0	1	3q29
HESX1	0	0	1	0	0	1	3p14.3
PVRL3	0	0	1	0	0	1	3q13.13
PIK3R3	0	0	1	0	0	1	1p34.1
CLDND1	0	0	1	0	0	1	3q11.2
NFAT5	0	0	1	0	0	1	16q22.1
PPM1J	0	0	1	0	0	1	1p13.2
RHCE	0	0	1	0	0	1	1p36.11
MECOM	0	0	1	0	0	1	3q26.2
ESYT3	0	0	1	0	0	1	3q22.3
ASB14	0	0	1	0	0	1	3p14.3
FAM46A	0	0	1	0	0	1	6q14.1
LPP	0	0	1	0	0	1	3q27.3
MCCC1	0	0	1	0	0	1	3q27.1
GSTM3	0	0	1	0	0	1	1p13.3
PSMD7	0	0	1	0	0	1	16q23.1
ULBP3	0	0	1	0	0	1	6q25.1
FSTL1	0	0	1	0	0	1	3q13.33
CCDC14	0	0	1	0	0	1	3q21.1
ARHGEF16	0	0	1	0	0	1	1p36.32
TREX1	0	0	1	0	0	1	3p21.31
TIGIT	0	0	1	0	0	1	3q13.31
LRRC8B	0	0	1	0	0	1	1p22.2
PROS1	0	0	1	0	0	1	3q11.1
ATAD3A	0	0	1	0	0	1	1p36.33
CLSPN	0	0	1	0	0	1	1p34.3
AURKAIP1	0	0	1	0	0	1	1p36.33
PDCD6IP	0	0	1	0	0	1	3p22.3
HES1	0	0	1	0	0	1	3q29
SASS6	0	0	1	0	0	1	1p21.2
CRBN	0	0	1	0	0	1	3p26.2
CASP8AP2	0	0	1	0	0	1	6q15
WWTR1	0	0	1	0	0	1	3q25.1
EPB41L2	0	0	1	0	0	1	6q23.1
PHF7	0	0	1	0	0	1	3p21.1
ATP13A2	0	0	1	0	0	1	1p36.13
LRP8	0	0	1	0	0	1	1p32.3
APRT	0	0	1	0	0	1	16q24.3
RHOC	0	0	1	0	0	1	1p13.2
RUNX3	0	0	1	0	0	1	1p36.11
RABL3	0	0	1	0	0	1	3q13.33
SPATA6	0	0	1	0	0	1	1p33
CCDC66	0	0	1	0	0	1	3p14.3
ZFP1	0	0	1	0	0	1	16q23.1
OXSR1	0	0	1	0	0	1	3p22.2
GFI1	0	0	1	0	0	1	1p22.1
NIP7	0	0	1	0	0	1	16q22.1
KLHL32	0	0	1	0	0	1	6q16.1
FAM167B	0	0	1	0	0	1	1p35.1
RERE	0	0	1	0	0	1	1p36.23
SLC16A4	0	0	1	0	0	1	1p13.3
SLC35A3	0	0	1	0	0	1	1p21.2
DLGAP3	0	0	1	0	0	1	1p34.3
SYDE2	0	0	1	0	0	1	1p22.3
BOC	0	0	1	0	0	1	3q13.2
LEPRE1	0	0	1	0	0	1	1p34.2
PRPF38B	0	0	1	0	0	1	1p13.3
CD86	0	0	1	0	0	1	3q13.33
UQCRC1	0	0	1	0	0	1	3p21.31
CHIA	0	0	1	0	0	1	1p13.2
HAS3	0	0	1	0	0	1	16q22.1
WDR47	0	0	1	0	0	1	1p13.3
ZMYM6	0	0	1	0	0	1	1p34.3
LRRIQ3	0	0	1	0	0	1	1p31.1
NR2C2	0	0	1	0	0	1	3p25.1
ZNF644	0	0	1	0	0	1	1p22.2
MAN1A2	0	0	1	0	0	1	1p12
FRMD4B	0	0	1	0	0	1	3p14.1
SLC25A36	0	0	1	0	0	1	3q23
TAF13	0	0	1	0	0	1	1p13.3
TPBG	0	0	1	0	0	1	6q14.1
AMIGO3	0	0	1	0	0	1	3p21.31
USP13	0	0	1	0	0	1	3q26.33
BBX	0	0	1	0	0	1	3q13.12
SSX2IP	0	0	1	0	0	1	1p22.3
CD53	0	0	1	0	0	1	1p13.3
MAGI3	0	0	1	0	0	1	1p13.2
IL20RB	0	0	1	0	0	1	3q22.3
ATR	0	0	1	0	0	1	3q23
PLOD2	0	0	1	0	0	1	3q24
CMC1	0	0	1	0	0	1	3p24.1
DHFRL1	0	0	1	0	0	1	3q11.1
TARDBP	0	0	1	0	0	1	1p36.22
EZR	0	0	1	0	0	1	6q25.3
PODN	0	0	1	0	0	1	1p32.3
RNF13	0	0	1	0	0	1	3q25.1
MAP3K5	0	0	1	0	0	1	6q23.3
HNRNPR	0	0	1	0	0	1	1p36.12
TNFSF10	0	0	1	0	0	1	3q26.31
ZZZ3	0	0	1	0	0	1	1p31.1
FGF12	0	0	1	0	0	1	3q28
MST1P2	0	0	1	0	0	1	1p36.13
P2RY13	0	0	1	0	0	1	3q25.1
SLC22A16	0	0	1	0	0	1	6q21
SNX7	0	0	1	0	0	1	1p21.3
EOMES	0	0	1	0	0	1	3p24.1
GEMIN8P4	0	0	1	0	0	1	1p22.2
TM4SF1	0	0	1	0	0	1	3q25.1
TXLNB	0	0	1	0	0	1	6q24.1
CTTNBP2NL	0	0	1	0	0	1	1p13.2
MUC20	0	0	1	0	0	1	3q29
CCDC80	0	0	1	0	0	1	3q13.2
LMOD3	0	0	1	0	0	1	3p14.1
FAIM	0	0	1	0	0	1	3q22.3
CCR5	0	0	1	0	0	1	3p21.31
B3GALNT1	0	0	1	0	0	1	3q26.1
FAM194A	0	0	1	0	0	1	3q25.1
PDE12	0	0	1	0	0	1	3p14.3
CCDC36	0	0	1	0	0	1	3p21.31
EVI5	0	0	1	0	0	1	1p22.1
MASP2	0	0	1	0	0	1	1p36.22
ZBED2	0	0	1	0	0	1	3q13.2
DIRAS3	0	0	1	0	0	1	1p31.3
SLC35E2	0	0	1	0	0	1	1p36.33
GLTPD1	0	0	1	0	0	1	1p36.33
NR0B2	0	0	1	0	0	1	1p36.11
TMED5	0	0	1	0	0	1	1p22.1
DZIP3	0	0	1	0	0	1	3q13.13
NKAIN1	0	0	1	0	0	1	1p35.2
SFPQ	0	0	1	0	0	1	1p34.3
TCTE3	0	0	1	0	0	1	6q27
PRR18	0	0	1	0	0	1	6q27
SLMAP	0	0	1	0	0	1	3p14.3
ACOX2	0	0	1	0	0	1	3p14.3
MANEA	0	0	1	0	0	1	6q16.1
DHX36	0	0	1	0	0	1	3q25.2
CITED2	0	0	1	0	0	1	6q24.1
BHLHE40	0	0	1	0	0	1	3p26.1
CCDC54	0	0	1	0	0	1	3q13.12
CXCR6	0	0	1	0	0	1	3p21.31
ZSWIM5	0	0	1	0	0	1	1p34.1
IQCG	0	0	1	0	0	1	3q29
DBNDD1	0	0	1	0	0	1	16q24.3
FAAH	0	0	1	0	0	1	1p33
CYB5R4	0	0	1	0	0	1	6q14.2
LRRC34	0	0	1	0	0	1	3q26.2
ADAT2	0	0	1	0	0	1	6q24.2
RBM6	0	0	1	0	0	1	3p21.31
DNTTIP2	0	0	1	0	0	1	1p22.1
ZNF326	0	0	1	0	0	1	1p22.2
COPB2	0	0	1	0	0	1	3q23
IGSF10	0	0	1	0	0	1	3q25.1
CHMP2B	0	0	1	0	0	1	3p11.2
LRRN1	0	0	1	0	0	1	3p26.2
KCNQ4	0	0	1	0	0	1	1p34.2
NIPAL3	0	0	1	0	0	1	1p36.11
FAM73A	0	0	1	0	0	1	1p31.1
TAS1R1	0	0	1	0	0	1	1p36.31
LACE1	0	0	1	0	0	1	6q21
PLEKHG1	0	0	1	0	0	1	6q25.1
SDHAP1	0	0	1	0	0	1	3q29
LINC00882	0	0	1	0	0	1	3q13.12
ZNF660	0	0	1	0	0	1	3p21.31
ZYG11A	0	0	1	0	0	1	1p32.3
GBP5	0	0	1	0	0	1	1p22.2
C3orf20	0	0	1	0	0	1	3p25.1
PRSS45	0	0	1	0	0	1	3p21.31
LRRC39	0	0	1	0	0	1	1p21.2
PPP1R2	0	0	1	0	0	1	3q29
FOXL2	0	0	1	0	0	1	3q22.3
LOC100129534	0	0	1	0	0	1	1p36.33
HLTF	0	0	1	0	0	1	3q24
DLG1	0	0	1	0	0	1	3q29
GJA9	0	0	1	0	0	1	1p34.3
CLSTN1	0	0	1	0	0	1	1p36.22
LINC01144	0	0	1	0	0	1	1p34.1
SNHG3	0	0	1	0	0	1	1p35.3
CENPN	0	0	1	0	0	1	16q23.2
RBM5	0	0	1	0	0	1	3p21.31
GAS8	0	0	1	0	0	1	16q24.3
SH3BGRL2	0	0	1	0	0	1	6q14.1
GRIK2	0	0	1	0	0	1	6q16.3
TNFRSF8	0	0	1	0	0	1	1p36.22
CDH8	0	0	1	0	0	1	16q21
XIRP1	0	0	1	0	0	1	3p22.2
CD96	0	0	1	0	0	1	3q13.13
SUCNR1	0	0	1	0	0	1	3q25.1
ZBTB8A	0	0	1	0	0	1	1p35.1
PDIA5	0	0	1	0	0	1	3q21.1
HFM1	0	0	1	0	0	1	1p22.2
OSBPL11	0	0	1	0	0	1	3q21.2
RBMXL1	0	0	1	0	0	1	1p22.2
TRAT1	0	0	1	0	0	1	3q13.13
ALDH4A1	0	0	1	0	0	1	1p36.13
MRPS22	0	0	1	0	0	1	3q23
TMEM158	0	0	1	0	0	1	3p21.31
CMIP	0	0	1	0	0	1	16q23.2
CCDC30	0	0	1	0	0	1	1p34.2
HSPB7	0	0	1	0	0	1	1p36.13
GIPC2	0	0	1	0	0	1	1p31.1
CD200R1	0	0	1	0	0	1	3q13.2
SNORA20	0	0	1	0	0	1	6q25.3
LRRC3B	0	0	1	0	0	1	3p24.1
TNFRSF9	0	0	1	0	0	1	1p36.23
MBNL1	0	0	1	0	0	1	3q25.1
PHIP	0	0	1	0	0	1	6q14.1
RABGGTB	0	0	1	0	0	1	1p31.1
TMEM52	0	0	1	0	0	1	1p36.33
PHC3	0	0	1	0	0	1	3q26.2
SEC63	0	0	1	0	0	1	6q21
ATP11B	0	0	1	0	0	1	3q26.33
C3orf18	0	0	1	0	0	1	3p21.31
POPDC2	0	0	1	0	0	1	3q13.33
GBP4	0	0	1	0	0	1	1p22.2
GNL3	0	0	1	0	0	1	3p21.1
MCOLN3	0	0	1	0	0	1	1p22.3
STXBP3	0	0	1	0	0	1	1p13.3
CACHD1	0	0	1	0	0	1	1p31.3
DENND2C	0	0	1	0	0	1	1p13.2
ZRANB2	0	0	1	0	0	1	1p31.1
BCLAF1	0	0	1	0	0	1	6q23.3
CD2	0	0	1	0	0	1	1p13.1
HIVEP3	0	0	1	0	0	1	1p34.2
SYTL1	0	0	1	0	0	1	1p36.11
GBP1	0	0	1	0	0	1	1p22.2
OPA1	0	0	1	0	0	1	3q29
EDEM1	0	0	1	0	0	1	3p26.1
CRYBG3	0	0	1	0	0	1	3q11.2
MAN1A1	0	0	1	0	0	1	6q22.31
ARHGEF19	0	0	1	0	0	1	1p36.13
SLC25A24	0	0	1	0	0	1	1p13.3
SRPRB	0	0	1	0	0	1	3q22.1
KHDC1L	0	0	1	0	0	1	6q13
TSSK3	0	0	1	0	0	1	1p35.1
CEP70	0	0	1	0	0	1	3q22.3
BCAR3	0	0	1	0	0	1	1p22.1
TGFBR3	0	0	1	0	0	1	1p22.1
GOLGA4	0	0	1	0	0	1	3p22.2
ACAD11	0	0	1	0	0	1	3q22.1
NBPF3	0	0	1	0	0	1	1p36.12
C6orf163	0	0	1	0	0	1	6q15
FRRS1	0	0	1	0	0	1	1p21.2
SMIM1	0	0	1	0	0	1	1p36.32
HPDL	0	0	1	0	0	1	1p34.1
TNFRSF1B	0	0	1	0	0	1	1p36.22
LINC01777	0	0	1	0	0	1	1p36.32
NPHP4	0	0	1	0	0	1	1p36.31
GOLGB1	0	0	1	0	0	1	3q13.33
EBLN2	0	0	1	0	0	1	3p13
GBP1P1	0	0	1	0	0	1	1p22.2
PLEKHN1	0	0	1	0	0	1	1p36.33
PTPRK	0	0	1	0	0	1	6q22.33
B3GNT5	0	0	1	0	0	1	3q27.1
FANCA	0	0	1	0	0	1	16q24.3
RAD54L	0	0	1	0	0	1	1p34.1
TEX264	0	0	1	0	0	1	3p21.2
FBXO5	0	0	1	0	0	1	6q25.2
C3orf49	0	0	1	0	0	1	3p14.1
NR1D2	0	0	1	0	0	1	3p24.2
GPR6	0	0	1	0	0	1	6q21
PRKAR2A	0	0	1	0	0	1	3p21.31
POC1A	0	0	1	0	0	1	3p21.2
PPP4R2	0	0	1	0	0	1	3p13
CPNE7	0	0	1	0	0	1	16q24.3
PRAMEF12	0	0	1	0	0	1	1p36.21
PDZRN3	0	0	1	0	0	1	3p13
CITED4	0	0	1	0	0	1	1p34.2
WFDC1	0	0	1	0	0	1	16q24.1
RAET1G	0	0	1	0	0	1	6q25.1
ZMYM1	0	0	1	0	0	1	1p34.3
CCNL1	0	0	1	0	0	1	3q25.31
CCR3	0	0	1	0	0	1	3p21.31
CYB561D2	0	0	1	0	0	1	3p21.31
WDR52	0	0	1	0	0	1	3q13.2
CCR4	0	0	1	0	0	1	3p22.3
SEPN1	0	0	1	0	0	1	1p36.11
STXBP5L	0	0	1	0	0	1	3q13.33
RAB3B	0	0	1	0	0	1	1p32.3
ST3GAL6	0	0	1	0	0	1	3q12.1
IL22RA2	0	0	1	0	0	1	6q23.3
UBA7	0	0	1	0	0	1	3p21.31
TMEM201	0	0	1	0	0	1	1p36.22
FGD5	0	0	1	0	0	1	3p25.1
DNASE1L3	0	0	1	0	0	1	3p14.3
KAT2B	0	0	1	0	0	1	3p24.3
GBP7	0	0	1	0	0	1	1p22.2
EPM2AIP1	0	0	1	0	0	1	3p22.2
SPATA2L	0	0	1	0	0	1	16q24.3
GHRL	0	0	1	0	0	1	3p25.3
LINC02085	0	0	1	0	0	1	3q12.3
KPNA1	0	0	1	0	0	1	3q21.1
ZNF654	0	0	1	0	0	1	3p11.1
CALML6	0	0	1	0	0	1	1p36.33
PTBP2	0	0	1	0	0	1	1p21.3
CDCP1	0	0	1	0	0	1	3p21.31
SLC35F1	0	0	1	0	0	1	6q22.1
E2F2	0	0	1	0	0	1	1p36.12
TOPBP1	0	0	1	0	0	1	3q22.1
DLEC1	0	0	1	0	0	1	3p22.2
SGK1	0	0	1	0	0	1	6q23.2
SNTB2	0	0	1	0	0	1	16q22.1
COL16A1	0	0	1	0	0	1	1p35.2
C1orf162	0	0	1	0	0	1	1p13.2
COL6A4P2	0	0	1	0	0	1	3q22.1
RASA2	0	0	1	0	0	1	3q23
CHI3L2	0	0	1	0	0	1	1p13.3
HEG1	0	0	1	0	0	1	3q21.2
C3orf35	0	0	1	0	0	1	3p22.2
ZNF469	0	0	1	0	0	1	16q24.2
ATP6V1A	0	0	1	0	0	1	3q13.2
WNT4	0	0	1	0	0	1	1p36.12
MYSM1	0	0	1	0	0	1	1p32.1
RAVER2	0	0	1	0	0	1	1p31.3
IQCF1	0	0	1	0	0	1	3p21.2
PTPN22	0	0	1	0	0	1	1p13.2
FUBP1	0	0	1	0	0	1	1p31.1
ATP1B3	0	0	1	0	0	1	3q23
HACL1	0	0	1	0	0	1	3p25.1
GBP3	0	0	1	0	0	1	1p22.2
NAALADL2	0	0	1	0	0	1	3q26.31
CSPG5	0	0	1	0	0	1	3p21.31
SEC62	0	0	1	0	0	1	3q26.2
HHATL	0	0	1	0	0	1	3p22.1
FAM159A	0	0	1	0	0	1	1p32.3
KCNH8	0	0	1	0	0	1	3p24.3
PHTF1	0	0	1	0	0	1	1p13.2
PPM1L	0	0	1	0	0	1	3q25.33
CCRL2	0	0	1	0	0	1	3p21.31
GPR171	0	0	1	0	0	1	3q25.1
SLC25A20	0	0	1	0	0	1	3p21.31
OSTN	0	0	1	0	0	1	3q28
ZBTB11	0	0	1	0	0	1	3q12.3
SLC6A9	0	0	1	0	0	1	1p34.1
LINC01134	0	0	1	0	0	1	1p36.32
C3orf36	0	0	1	0	0	1	3q22.1
BTLA	0	0	1	0	0	1	3q13.2
PGM1	0	0	1	0	0	1	1p31.3
NT5DC2	0	0	1	0	0	1	3p21.1
FBXO40	0	0	1	0	0	1	3q13.33
RFPL4B	0	0	1	0	0	1	6q21
GBP6	0	0	1	0	0	1	1p22.2
FBXO45	0	0	1	0	0	1	3q29
DCUN1D1	0	0	1	0	0	1	3q26.33
KHDRBS2	0	0	1	0	0	1	6q11.1
MGLL	0	0	1	0	0	1	3q21.3
ULK4	0	0	1	0	0	1	3p22.1
PBOV1	0	0	1	0	0	1	6q23.3
CCDC39	0	0	1	0	0	1	3q26.33
CCDC17	0	0	1	0	0	1	1p34.1
SLC33A1	0	0	1	0	0	1	3q25.31
KLHL17	0	0	1	0	0	1	1p36.33
KPNA4	0	0	1	0	0	1	3q25.33
ARL14	0	0	1	0	0	1	3q25.33
BACH2	0	0	1	0	0	1	6q15
KLHDC8B	0	0	1	0	0	1	3p21.31
ATAD3C	0	0	1	0	0	1	1p36.33
CAPZA1	0	0	1	0	0	1	1p13.2
GLMN	0	0	1	0	0	1	1p22.1
COL10A1	0	0	1	0	0	1	6q22.1
UROC1	0	0	1	0	0	1	3q21.3
CHST6	0	0	1	0	0	1	16q23.1
SERINC2	0	0	1	0	0	1	1p35.2
PDCD10	0	0	1	0	0	1	3q26.1
SENP7	0	0	1	0	0	1	3q12.3
CD80	0	0	1	0	0	1	3q13.33
TGFBR2	0	0	1	0	0	1	3p24.1
CD200	0	0	1	0	0	1	3q13.2
RBMS3	0	0	1	0	0	1	3p24.1
MCOLN2	0	0	1	0	0	1	1p22.3
DNAH12	0	0	1	0	0	1	3p14.3
CLCNKA	0	0	1	0	0	1	1p36.13
SNX4	0	0	1	0	0	1	3q21.2
HEY2	0	0	1	0	0	1	6q22.31
SEMA3F	0	0	1	0	0	1	3p21.31
VIP	0	0	1	0	0	1	6q25.2
TTC39A	0	0	1	0	0	1	1p32.3
GCLM	0	0	1	0	0	1	1p22.1
EXT1	0	1	0	0	0	1	8q24.11
ADCK5	0	1	0	0	0	1	8q24.3
C8orf33	0	1	0	0	0	1	8q24.3
TBC1D22B	0	1	0	0	0	1	6p21.2
DECR1	0	1	0	0	0	1	8q21.3
COMMD5	0	1	0	0	0	1	8q24.3
PYCRL	0	1	0	0	0	1	8q24.3
ZNF517	0	1	0	0	0	1	8q24.3
TRIM27	0	1	0	0	0	1	6p22.1
ABCC10	0	1	0	0	0	1	6p21.1
DAXX	0	1	0	0	0	1	6p21.32
EXOSC4	0	1	0	0	0	1	8q24.3
ZFAND3	0	1	0	0	0	1	6p21.2
ABCF1	0	1	0	0	0	1	6p21.33
NDUFB9	0	1	0	0	0	1	8q24.13
CYC1	0	1	0	0	0	1	8q24.3
LAPTM4B	0	1	0	0	0	1	8q22.1
TXNDC5	0	1	0	0	0	1	6p24.3
CHD7	0	1	0	0	0	1	8q12.1
DGAT1	0	1	0	0	0	1	8q24.3
DERL1	0	1	0	0	0	1	8q24.13
ZNF707	0	1	0	0	0	1	8q24.3
C6orf89	0	1	0	0	0	1	6p21.2
PTK2	0	1	0	0	0	1	8q24.3
TJAP1	0	1	0	0	0	1	6p21.1
JARID2	0	1	0	0	0	1	6p22.3
RECQL4	0	1	0	0	0	1	8q24.3
TIGD5	0	1	0	0	0	1	8q24.3
TRIM39	0	1	0	0	0	1	6p22.1
DENND3	0	1	0	0	0	1	8q24.3
ZFP41	0	1	0	0	0	1	8q24.3
DHX16	0	1	0	0	0	1	6p21.33
PBX2	0	1	0	0	0	1	6p21.32
MFSD3	0	1	0	0	0	1	8q24.3
PARP10	0	1	0	0	0	1	8q24.3
PVT1	0	1	0	0	0	1	8q24.21
BRD2	0	1	0	0	0	1	6p21.32
KLHL38	0	1	0	0	0	1	8q24.13
LYN	0	1	0	0	0	1	8q12.1
TOMM6	0	1	0	0	0	1	6p21.1
NAPRT1	0	1	0	0	0	1	8q24.3
ENY2	0	1	0	0	0	1	8q23.1
YWHAZ	0	1	0	0	0	1	8q22.3
C6orf47	0	1	0	0	0	1	6p21.33
FAM83H	0	1	0	0	0	1	8q24.3
PUF60	0	1	0	0	0	1	8q24.3
CHRAC1	0	1	0	0	0	1	8q24.3
ZBTB22	0	1	0	0	0	1	6p21.32
WRNIP1	0	1	0	0	0	1	6p25.2
TCEB1	0	1	0	0	0	1	8q21.11
BYSL	0	1	0	0	0	1	6p21.1
RIPK2	0	1	0	0	0	1	8q21.3
FARS2	0	1	0	0	0	1	6p25.1
ZNF696	0	1	0	0	0	1	8q24.3
ZBTB9	0	1	0	0	0	1	6p21.32
FBXL6	0	1	0	0	0	1	8q24.3
RXRB	0	1	0	0	0	1	6p21.32
VPS52	0	1	0	0	0	1	6p21.32
ATF6B	0	1	0	0	0	1	6p21.33
XPO5	0	1	0	0	0	1	6p21.1
TSNARE1	0	1	0	0	0	1	8q24.3
AARS2	0	1	0	0	0	1	6p21.1
PPIL1	0	1	0	0	0	1	6p21.2
ASAP1	0	1	0	0	0	1	8q24.21
TCEA1	0	1	0	0	0	1	8q11.23
NSMAF	0	1	0	0	0	1	8q12.1
CPSF1	0	1	0	0	0	1	8q24.3
HSPA1L	0	1	0	0	0	1	6p21.33
CEBPD	0	1	0	0	0	1	8q11.21
ZBTB12	0	1	0	0	0	1	6p21.33
RAB2A	0	1	0	0	0	1	8q12.1
LEMD2	0	1	0	0	0	1	6p21.31
DCAF13	0	1	0	0	0	1	8q22.3
GTF2H4	0	1	0	0	0	1	6p21.33
SHARPIN	0	1	0	0	0	1	8q24.3
ATP6V1H	0	1	0	0	0	1	8q11.23
OSGIN2	0	1	0	0	0	1	8q21.3
PRKDC	0	1	0	0	0	1	8q11.21
JRK	0	1	0	0	0	1	8q24.3
RING1	0	1	0	0	0	1	6p21.32
TMEM70	0	1	0	0	0	1	8q21.11
C8orf76	0	1	0	0	0	1	8q24.13
DUSP22	0	1	0	0	0	1	6p25.3
SDCBP	0	1	0	0	0	1	8q12.1
LRRC14	0	1	0	0	0	1	8q24.3
CHCHD7	0	1	0	0	0	1	8q12.1
COPS5	0	1	0	0	0	1	8q13.1
RNF139	0	1	0	0	0	1	8q24.13
WDR46	0	1	0	0	0	1	6p21.32
AZIN1	0	1	0	0	0	1	8q22.3
E2F3	0	1	0	0	0	1	6p22.3
PPT2	0	1	0	0	0	1	6p21.32
SERPINB6	0	1	0	0	0	1	6p25.2
SNRPC	0	1	0	0	0	1	6p21.31
GSDMD	0	1	0	0	0	1	8q24.3
SRF	0	1	0	0	0	1	6p21.1
TMEM14C	0	1	0	0	0	1	6p24.2
CYHR1	0	1	0	0	0	1	8q24.3
MRPS18B	0	1	0	0	0	1	6p21.33
MRPS28	0	1	0	0	0	1	8q21.13
RGL2	0	1	0	0	0	1	6p21.32
MRPL15	0	1	0	0	0	1	8q11.23
VPS28	0	1	0	0	0	1	8q24.3
TRAM1	0	1	0	0	0	1	8q13.3
SLC39A7	0	1	0	0	0	1	6p21.32
ANKS1A	0	1	0	0	0	1	6p21.31
KLC4	0	1	0	0	0	1	6p21.1
PEX2	0	1	0	0	0	1	8q21.11
SLC45A4	0	1	0	0	0	1	8q24.3
POLR2K	0	1	0	0	0	1	8q22.2
CDYL	0	1	0	0	0	1	6p25.1
MRPL13	0	1	0	0	0	1	8q24.12
SLC35B2	0	1	0	0	0	1	6p21.1
TSPYL5	0	1	0	0	0	1	8q22.1
ALDH5A1	0	1	0	0	0	1	6p22.3
BRPF3	0	1	0	0	0	1	6p21.31
GTPBP2	0	1	0	0	0	1	6p21.1
MCM4	0	1	0	0	0	1	8q11.21
TSTA3	0	1	0	0	0	1	8q24.3
GLO1	0	1	0	0	0	1	6p21.2
HRSP12	0	1	0	0	0	1	8q22.2
MED30	0	1	0	0	0	1	8q24.11
GPAA1	0	1	0	0	0	1	8q24.3
NUDT3	0	1	0	0	0	1	6p21.31
MEA1	0	1	0	0	0	1	6p21.1
TOB2P1	0	1	0	0	0	1	6p22.1
HSP90AB1	0	1	0	0	0	1	6p21.1
CPNE3	0	1	0	0	0	1	8q21.3
NEU1	0	1	0	0	0	1	6p21.33
BPHL	0	1	0	0	0	1	6p25.2
CCHCR1	0	1	0	0	0	1	6p21.33
TAF11	0	1	0	0	0	1	6p21.31
HSD17B8	0	1	0	0	0	1	6p21.32
KLHDC3	0	1	0	0	0	1	6p21.1
RREB1	0	1	0	0	0	1	6p24.3
CNPY3	0	1	0	0	0	1	6p21.1
E2F5	0	1	0	0	0	1	8q21.2
ZNF34	0	1	0	0	0	1	8q24.3
TGS1	0	1	0	0	0	1	8q12.1
UBE2V2	0	1	0	0	0	1	8q11.21
POLR1C	0	1	0	0	0	1	6p21.1
FAM50B	0	1	0	0	0	1	6p25.2
KIAA1429	0	1	0	0	0	1	8q22.1
FLOT1	0	1	0	0	0	1	6p21.33
MDC1	0	1	0	0	0	1	6p21.33
TMEM68	0	1	0	0	0	1	8q12.1
PTK7	0	1	0	0	0	1	6p21.1
SSR1	0	1	0	0	0	1	6p24.3
GMDS	0	1	0	0	0	1	6p25.3
PPP2R5D	0	1	0	0	0	1	6p21.1
TMEM63B	0	1	0	0	0	1	6p21.1
ZNF623	0	1	0	0	0	1	8q24.3
GRINA	0	1	0	0	0	1	8q24.3
UBE2W	0	1	0	0	0	1	8q21.11
SCRIB	0	1	0	0	0	1	8q24.3
TRIB1	0	1	0	0	0	1	8q24.13
CUL7	0	1	0	0	0	1	6p21.1
BOP1	0	1	0	0	0	1	8q24.3
FRS3	0	1	0	0	0	1	6p21.1
UBR5	0	1	0	0	0	1	8q22.3
LSM2	0	1	0	0	0	1	6p21.33
ZC3H3	0	1	0	0	0	1	8q24.3
EXOC2	0	1	0	0	0	1	6p25.3
VCPIP1	0	1	0	0	0	1	8q13.1
EBAG9	0	1	0	0	0	1	8q23.2
PTDSS1	0	1	0	0	0	1	8q22.1
ZKSCAN4	0	1	0	0	0	1	6p22.1
HCG18	0	1	0	0	0	1	6p22.1
RNF5	0	1	0	0	0	1	6p21.32
SLC25A32	0	1	0	0	0	1	8q22.3
TUBB	0	1	0	0	0	1	6p21.33
STK19	0	1	0	0	0	1	6p21.33
GNL1	0	1	0	0	0	1	6p21.33
MTDH	0	1	0	0	0	1	8q22.1
FAM49B	0	1	0	0	0	1	8q24.21
ZKSCAN3	0	1	0	0	0	1	6p22.1
POLH	0	1	0	0	0	1	6p21.1
YIPF3	0	1	0	0	0	1	6p21.1
STK3	0	1	0	0	0	1	8q22.2
C6orf52	0	1	0	0	0	1	6p24.2
ARFGEF1	0	1	0	0	0	1	8q13.2
KIFC2	0	1	0	0	0	1	8q24.3
HIST1H2AC	0	1	0	0	0	1	6p22.2
BAK1	0	1	0	0	0	1	6p21.31
OPLAH	0	1	0	0	0	1	8q24.3
MTFR1	0	1	0	0	0	1	8q13.1
RPS10	0	1	0	0	0	1	6p21.31
ZNF7	0	1	0	0	0	1	8q24.3
MTERFD1	0	1	0	0	0	1	8q22.1
TAF8	0	1	0	0	0	1	6p21.1
NBN	0	1	0	0	0	1	8q21.3
TMEM64	0	1	0	0	0	1	8q21.3
MRPS10	0	1	0	0	0	1	6p21.1
TRIM26	0	1	0	0	0	1	6p22.1
COX6C	0	1	0	0	0	1	8q22.2
SMIM13	0	1	0	0	0	1	6p24.2
VPS13B	0	1	0	0	0	1	8q22.2
RNF144B	0	1	0	0	0	1	6p22.3
GEM	0	1	0	0	0	1	8q22.1
IMPA1	0	1	0	0	0	1	8q21.13
KIAA0196	0	1	0	0	0	1	8q24.13
TERF1	0	1	0	0	0	1	8q21.11
ZFAT	0	1	0	0	0	1	8q24.22
MCM3	0	1	0	0	0	1	6p12.2
ARHGAP39	0	1	0	0	0	1	8q24.3
RNF8	0	1	0	0	0	1	6p21.2
RPL7L1	0	1	0	0	0	1	6p21.1
PPP1R11	0	1	0	0	0	1	6p22.1
KCTD20	0	1	0	0	0	1	6p21.31
LY6E	0	1	0	0	0	1	8q24.3
AGPAT1	0	1	0	0	0	1	6p21.32
FANCE	0	1	0	0	0	1	6p21.31
ZBTB10	0	1	0	0	0	1	8q21.13
ATP6V1C1	0	1	0	0	0	1	8q22.3
YTHDF3	0	1	0	0	0	1	8q12.3
ZNF704	0	1	0	0	0	1	8q21.13
MAF1	0	1	0	0	0	1	8q24.3
PAG1	0	1	0	0	0	1	8q21.13
IMPAD1	0	1	0	0	0	1	8q12.1
STAU2	0	1	0	0	0	1	8q21.11
NUP153	0	1	0	0	0	1	6p22.3
EHMT2	0	1	0	0	0	1	6p21.33
TBCC	0	1	0	0	0	1	6p21.1
EEF1E1	0	1	0	0	0	1	6p24.3
MAD2L1BP	0	1	0	0	0	1	6p21.1
ZNF311	0	1	0	0	0	1	6p22.1
UBXN2B	0	1	0	0	0	1	8q12.1
TRAPPC9	0	1	0	0	0	1	8q24.3
LYPLA1	0	1	0	0	0	1	8q11.23
POP1	0	1	0	0	0	1	8q22.2
CSNK2B	0	1	0	0	0	1	6p21.33
TEAD3	0	1	0	0	0	1	6p21.31
RPS18	0	1	0	0	0	1	6p21.32
DTNBP1	0	1	0	0	0	1	6p22.3
GLI4	0	1	0	0	0	1	8q24.3
PPARD	0	1	0	0	0	1	6p21.31
UTP23	0	1	0	0	0	1	8q24.11
TCF19	0	1	0	0	0	1	6p21.33
RPL10A	0	1	0	0	0	1	6p21.31
MTCH1	0	1	0	0	0	1	6p21.2
LRRC24	0	1	0	0	0	1	8q24.3
VARS	0	1	0	0	0	1	6p21.33
BAI1	0	1	0	0	0	1	8q24.3
NFYA	0	1	0	0	0	1	6p21.1
FKBPL	0	1	0	0	0	1	6p21.33
KIF13A	0	1	0	0	0	1	6p22.3
SUPT3H	0	1	0	0	0	1	6p21.1
CD83	0	1	0	0	0	1	6p23
PDP1	0	1	0	0	0	1	8q22.1
ZNRD1	0	1	0	0	0	1	6p22.1
NCOA2	0	1	0	0	0	1	8q13.3
INTS8	0	1	0	0	0	1	8q22.1
WWP1	0	1	0	0	0	1	8q21.3
RANBP9	0	1	0	0	0	1	6p23
TRMT12	0	1	0	0	0	1	8q24.13
LACTB2	0	1	0	0	0	1	8q13.3
LARRPM	0	1	0	0	0	1	6p22.2
RNF19A	0	1	0	0	0	1	8q22.2
RAD21	0	1	0	0	0	1	8q24.11
PSMG4	0	1	0	0	0	1	6p25.2
C6orf106	0	1	0	0	0	1	6p21.31
TMEM14B	0	1	0	0	0	1	6p24.2
TAF2	0	1	0	0	0	1	8q24.12
SIRT5	0	1	0	0	0	1	6p23
HSF1	0	1	0	0	0	1	8q24.3
PFDN6	0	1	0	0	0	1	6p21.32
CUTA	0	1	0	0	0	1	6p21.32
OSR2	0	1	0	0	0	1	8q22.2
RUNX1T1	0	1	0	0	0	1	8q21.3
RIPK1	0	1	0	0	0	1	6p25.2
PLEC	0	1	0	0	0	1	8q24.3
FBXO32	0	1	0	0	0	1	8q24.13
ARMC1	0	1	0	0	0	1	8q13.1
LY6G5C	0	1	0	0	0	1	6p21.33
MRPS18A	0	1	0	0	0	1	6p21.1
BTBD9	0	1	0	0	0	1	6p21.2
RPP40	0	1	0	0	0	1	6p25.1
ZNF76	0	1	0	0	0	1	6p21.31
CUL9	0	1	0	0	0	1	6p21.1
SRPK1	0	1	0	0	0	1	6p21.31
SLC39A4	0	1	0	0	0	1	8q24.3
ZNF706	0	1	0	0	0	1	8q22.3
[truncated: 314 more rows]
